# Supplementary material for: Assessment of burden of drug-resistant tuberculosis at a tertiary care centre in northern India: a prospective single centre cohort study
Source: PubMed Central journal article supplement — BMJ Open. 2021 Apr 15;11(4):e044096. doi: 10.1136/bmjopen-2020-044096 (PMC8055106; doi:10.1136/bmjopen-2020-044096), 2021-04-15
Supplement: bmjopen-2020-044096.draft_revisions.pdf [file bmjopen-2020-044096.draft_revisions.pdf]

# BMJ Open

BMJ Open is committed to open peer review. As part of this commitment we make the peer review history of every article we publish publicly available.

When an article is published we post the peer reviewers' comments and the authors' responses online. We also post the versions of the paper that were used during peer review. These are the versions that the peer review comments apply to.

The versions of the paper that follow are the versions that were submitted during the peer review process. They are not the versions of record or the final published versions. They should not be cited or distributed as the published version of this manuscript.

BMJ Open is an open access journal and the full, final, typeset and author-corrected version of record of the manuscript is available on our site with no access controls, subscription charges or pay-per-view fees (<http://bmjopen.bmj.com>).

If you have any questions on BMJ Open's open peer review process please email [info.bmjopen@bmj.com](mailto:info.bmjopen@bmj.com)

# BMJ Open

## Assessment of burden of drug-resistant tuberculosis at a tertiary care center in northern India

|                               |                                                                                    |
|-------------------------------|------------------------------------------------------------------------------------|
| Journal:                      | <i>BMJ Open</i>                                                                    |
| Manuscript ID                 | bmjopen-2020-044096                                                                |
| Article Type:                 | Original research                                                                  |
| Date Submitted by the Author: | 22-Aug-2020                                                                        |
| Complete List of Authors:     | Misra, Richa; SGPGIMS<br>Kesarwani, Vasudha ; SGPGIMS<br>Nath, Alok; SGPGIMS,      |
| Keywords:                     | Tuberculosis < INFECTIOUS DISEASES, Epidemiology < TROPICAL MEDICINE, MICROBIOLOGY |
|                               |                                                                                    |

SCHOLARONE™  
Manuscripts

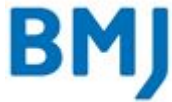

I, the Submitting Author has the right to grant and does grant on behalf of all authors of the Work (as defined in the below author licence), an exclusive licence and/or a non-exclusive licence for contributions from authors who are: i) UK Crown employees; ii) where BMJ has agreed a CC-BY licence shall apply, and/or iii) in accordance with the terms applicable for US Federal Government officers or employees acting as part of their official duties; on a worldwide, perpetual, irrevocable, royalty-free basis to BMJ Publishing Group Ltd ("BMJ") its licensees and where the relevant Journal is co-owned by BMJ to the co-owners of the Journal, to publish the Work in this journal and any other BMJ products and to exploit all rights, as set out in our [licence](#).

The Submitting Author accepts and understands that any supply made under these terms is made by BMJ to the Submitting Author unless you are acting as an employee on behalf of your employer or a postgraduate student of an affiliated institution which is paying any applicable article publishing charge ("APC") for Open Access articles. Where the Submitting Author wishes to make the Work available on an Open Access basis (and intends to pay the relevant APC), the terms of reuse of such Open Access shall be governed by a Creative Commons licence – details of these licences and which [Creative Commons](#) licence will apply to this Work are set out in our licence referred to above.

Other than as permitted in any relevant BMJ Author's Self Archiving Policies, I confirm this Work has not been accepted for publication elsewhere, is not being considered for publication elsewhere and does not duplicate material already published. I confirm all authors consent to publication of this Work and authorise the granting of this licence.

**TITLE PAGE**

**Title:** Assessment of burden of drug-resistant tuberculosis at a tertiary care center in northern India

**Authors and affiliations:** Richa Misra<sup>a</sup>, Vasudha Kesarwani<sup>a</sup>, Alok Nath<sup>\*b</sup>

<sup>a</sup>MD, Department of Microbiology, Division Mycobacteriology, Sanjay Gandhi Post-graduate Institute of Medical Sciences, Lucknow-226014, India

<sup>b</sup>MD, DM, Department of Pulmonary Medicine, Sanjay Gandhi Post-graduate Institute of Medical Sciences, Lucknow-226014, India

**\*Corresponding author:** Dr. Alok Nath, Professor, Department of Pulmonary Medicine, Sanjay Gandhi Post-graduate Institute of Medical Sciences, Lucknow-226014, India.

**Corresponding author E mail:**

[draloksgpgi@gmail.com](mailto:draloksgpgi@gmail.com)

Phone: +919839070065

Word count text: 2986

## Abstract

**Objectives:** We aim to define the burden of rifampicin monoresistant tuberculosis at a tertiary care centre in Northern India as well as determine the second line drug susceptibilities in a subset of patients.

**Methods:** A total of 3045 pulmonary (n=1883) and extra-pulmonary (n=1162) samples from suspected tuberculosis patients were subjected to microscopy, culture and the Xpert MTB/RIF assay from March 2017 to June 2019. Second line drug susceptibility testing by version 2 Line Probe Assay for Fluoroquinolones (FQs) and second line injectable drugs (SLIDs) was performed on 62 samples.

**Results:** Out of 3045 samples processed in our lab during the study period, 33.9% (1032/3045) were positive for MTBC and 21.6% were rifampicin mono-resistant (223/1032). The rate of rifampicin resistance in pulmonary samples was 22.1% (156/706) and in extrapulmonary cases it was 20.5% (67/326). Out of 62 cases included for second line testing, 37 were resistant to fluoroquinolones (77.4%) while 11 were extensively drug resistant (XDR).

**Conclusions:** India urgently needs to arrest an emerging multidrug-resistant tuberculosis epidemic to attain the Sustainable Development Goal (SDG) target of 2030. The majority of the isolates in our study were FQ resistant which is an exclusion criterion for the shorter MDR regimen recommended by World Health Organization.

**Keywords:** Tuberculosis; Multi-drug resistant; Xpert MTB/RIF assay; Line Probe Assay

## Article summary section

### Strengths and limitations of this study

- We have not come across any study from India performed on such a large number of pulmonary as well as extrapulmonary samples performed by both conventional and molecular methods.
- Our study provides comprehensive recent data on the burden of drug resistant TB in India at a 1200 bed tertiary care centre.
- We could not perform liquid culture Drug Susceptibility Testing (DST) of the isolates and DNA sequencing

## INTRODUCTION

India has the highest Tuberculosis (TB) burden in the world and is home to 27% of the world's estimated 10.4 million annual tuberculosis cases.<sup>1,2,3</sup> As per WHO Global TB Report 1,30,000 cases of MDR-TB occurred in India in 2016.<sup>1</sup>The Programmatic Management of Drug Resistant TB (PMDT) guidelines were rolled out in 2005 and integrates all programme based strategies for DR-TB diagnosis, management and treatment under RNTCP.<sup>4</sup> In fact, the government of India in an ambitious move has changed the name of the national programme from RNTCP to NTEP, National Tuberculosis Elimination Programme in December 2019, to achieve the Sustainable Development Goal of ending TB by 2025.

India also has a complex as well as unorganized health-care system which includes the government sector, private sector and informal health care providers practicing non-allopathic schools of medicine such as ayurveda and homeopathy<sup>2</sup>. Though TB was made a notifiable disease in 2012, less than 40% cases from the private sector were notified to the government in 2017.<sup>3</sup>

The shorter drug regimen of 9-12 months for MDR-TB patients was introduced by World Health Organization (WHO), in May 2016.<sup>5-7</sup>It was recommended in patients who have not been previously treated with second-line drugs and in whom resistance to fluoroquinolones and second-line injectable agents has been excluded. However, drug susceptibility testing in India is technically challenging and requires specialist laboratory facilities and personnel that are still not widely available in the country.<sup>8</sup>

With this background, we aim to define the burden of rifampicin mono-resistant tuberculosis at a

1  
2  
3 tertiary care referral medical center in northern India as well as determine the second line drug  
4  
5 susceptibilities in a subset of patients.  
6  
7

## 8 **METHODS**

### 9 **Study design and setting**

10  
11 This prospective observational study between March 2017 to June 2019 was conducted in the  
12  
13 Mycobacteriology section of the Department of Microbiology at Sanjay Gandhi Postgraduate  
14  
15 Institute of Medical Sciences, a 1200 bed tertiary care referral medical center in northern India.  
16  
17 The study protocol was approved by the ethics committee of the Institute.  
18  
19  
20  
21

### 22 **Clinical specimens**

23  
24 Three thousand forty five pulmonary and extrapulmonary samples (930 sputum, 752  
25  
26 bronchoalveolar lavage, 146 EBUS-TBNA (endobronchial ultrasound with real-time guided  
27  
28 transbronchial needle aspiration), 54 bronchial/tracheal aspirate, 429 lymph node aspirates/ Fine  
29  
30 Needle Aspiration Cytology(FNAC), 367 biopsies, 338 pus and 29 CSF were collected between  
31  
32 March 2017 and June 2019 during the clinical routine. All samples were divided into 2 portions  
33  
34 on receipt in the laboratory. One aliquot was used to perform the Xpert MTB/RIF assay while  
35  
36 microscopy and culture was performed from the remaining sample. Direct smears were prepared  
37  
38 from the specimens using Ziehl-Neelsen staining. All non-sterile clinical samples were processed  
39  
40 using the *N*-acetyl-Lcysteine-sodium citrate-NaOH (NALC-NaOH) method. Samples were  
41  
42 decanted following centrifugation, and sediments were re-suspended in 3 ml of phosphate buffer  
43  
44 solution. Processed samples were used to inoculate either Lowenstein-Jensen (LJ) solid medium  
45  
46 or BacT/Alert culture. Line probe assay *version2* (LPA<sub>v2</sub>) for second line testing was performed  
47  
48 on either direct clinical samples if volume was adequate or on positive culture. Both Xpert  
49  
50 MTB/RIF assay and LPA<sub>v2</sub> were performed according to the manufacturer's protocol.  
51  
52  
53  
54  
55  
56  
57  
58  
59  
60



1  
2  
3 All cases detected positive by the Xpert MTB/RIF assay were grouped into (i) those with smear-  
4 positive and culture positive tuberculosis; (ii) those with smear-negative, culture-positive  
5 tuberculosis; (iii) those who were both smear and culture negative for tuberculosis but who were  
6 nonetheless treated for tuberculosis on the basis of clinical, pathological, and/or radiological  
7 findings (clinical tuberculosis). There was a sub group of samples that were culture positive but  
8 missed by the Xpert MTB/RIF assay.  
9

### 16 **Data collection**

17  
18  
19 The medical records of patients were retrieved from the Hospital Information System. A senior  
20 resident extracted patient data prospectively from charts.  
21

### 22 **Classifications and definitions including RR-TB/MDR-TB/XDR-TB(rifampicin 23 resistant/multi-drug resistant/extensively drug resistant)<sup>9</sup>**

24  
25  
26 *A bacteriologically confirmed TB case:* One from whom a biological specimen was positive by  
27 smear microscopy, culture or WRD (WHO approved rapid diagnostic test) such as Xpert  
28 MTB/RIF assay.  
29

30  
31  
32 *Pulmonary tuberculosis (PTB):* Any bacteriologically confirmed or clinically diagnosed case of  
33 TB involving lung parenchyma or tracheobronchial tree.  
34

35  
36  
37 *Extrapulmonary tuberculosis (EPTB):* Any bacteriologically confirmed or clinically diagnosed  
38 case of TB involving organs other than the lungs, e.g. pleura, lymph nodes, abdomen,  
39 genitourinary tract, skin, joints and bones, meninges.  
40

41  
42  
43 *Multidrug resistance TB (MDR):* A TB patient, whose biological specimen is resistant to both H  
44 and R with or without resistance to other first-line anti-TB drugs.  
45  
46  
47  
48  
49

1  
2  
3 *Pre-XDR-TB*: It is defined as TB with resistance to isoniazid and rifampicin and either a FQ or a  
4  
5 second-line injectable agent but not both.  
6

7  
8 *Extensive drug resistance (XDR)*: A MDR-TB patient whose biological specimen is additionally  
9  
10 resistant to at least a FQ and a SLI anti-TB drug.  
11

## 12 **Patient and public involvement**

13  
14 Patients were involved in the reporting of our research in this study.  
15

## 16 **RESULTS**

17  
18 During the 27 month study period, 1883 pulmonary and 1162 extra-pulmonary specimens  
19  
20 (n=3045) were subjected to the GeneXpert MTB/RIF assay in our laboratory along with  
21  
22 concomitant smear and culture inoculation on the same sample. All duplicate isolates were  
23  
24 excluded. One thousand thirty two (33.8%) samples (706 pulmonary, 326 extra-pulmonary) were  
25  
26 detected for MTB complex. The assay failed to detect sixty nine samples that were culture  
27  
28 positive. The MPT64 antigen test was positive on all these cultures. There were 806 (78.10%)  
29  
30 males and 226 (21.89%) females among the positive specimens. The median age of patients was  
31  
32 32 years and nearly 43% patients were young adults in the age group of 30-45 years as shown in  
33  
34 Figure 1. Lymph node aspirates/FNAC and tissue biopsy (including colonic biopsy) were the  
35  
36 most common samples in extra-pulmonary cases that were positive. The sample distribution of  
37  
38 positive specimens is shown in Figure 2. Out of 1032 samples detected positive by the CBNAAT  
39  
40 assay, 507 and 517 specimens were smear and culture positive respectively. The rate of smear  
41  
42 and culture positivity in pulmonary and extra-pulmonary cases was 54.1%, 54.3%, 38.3% and  
43  
44 40.7% respectively (Table-1). The results of conventional and molecular diagnostic testing by  
45  
46 Xpert MTB/RIF assay of patients included in the study is shown in Figure 3.  
47  
48  
49  
50  
51  
52  
53  
54  
55  
56  
57  
58  
59  
60

1  
2  
3 During the study period, we also recovered 35 isolates of Non-tuberculous Mycobacteria (NTM)  
4 from various pus and respiratory specimens. These were *Mycobacterium abscessus* (n=15),  
5  
6 *Mycobacterium intracellulare* (7), *Mycobacterium fortuitum* (6), *Mycobacterium gordonae* (n=3)  
7  
8 and *Mycobacterium simiae* (n=3).  
9

10  
11  
12 Rifampicin monoresistance was detected in 223 out of 1032 samples (21.6%). It was 23.5%  
13  
14 (n=166/706) and 17.4% (57/326) in pulmonary and extra-pulmonary cases respectively (Figure  
15  
16  
17 4).  
18

19 A summary of the performance data is shown in Table 2. Five hundred and seventeen samples  
20  
21 were positive by culture resulting in an 86.6% agreement with the Xpert MTB/RIF assay. The  
22  
23 assay had a 100% agreement for culture positive, smear positive specimens and 61.6%  
24  
25 agreement for culture positive, smear negative specimens for the detection of *Mycobacterium*  
26  
27 *tuberculosis*. Sixty nine samples that were culture positive tested negative by the Xpert MTB/RIF  
28  
29 assay. We did not have any sample that was positive on both smear and culture but was negative  
30  
31 by Xpert MTB/RIF assay. As shown in Table 2, we detected 413 more patients than we could  
32  
33 have diagnosed by smear and/or culture alone.  
34  
35  
36

37 Out of 223 rifampicin resistant cases, we could put up second line drug susceptibility testing  
38  
39 by LPA v2.0 for 62 cases (n=40, pulmonary and n=22, extra-pulmonary). As shown in Figure 5,  
40  
41 majority of our patients (77.4%) were resistant to FLQs (n=48/62). Only 14 patients were  
42  
43 sensitive to both FLQ and SLID. Thirty seven cases were resistant to FQs only (Pre-XDR) while  
44  
45 11 were resistant to both classes of drugs (XDR). We did not recover any isolate that was  
46  
47 aminoglycoside resistant but FLQ sensitive.  
48  
49  
50

## 51 **DISCUSSION**

52  
53  
54 Multidrug-resistant tuberculosis is one of the greatest public health challenges worldwide.<sup>1,10-12</sup>  
55  
56  
57  
58  
59  
60

1  
2  
3 To the best of our knowledge, ours is the first study from India to determine the burden of drug  
4 resistant tuberculosis by testing such a large number of pulmonary and extrapulmonary clinical  
5 samples. As per WHO Global TB Report, 2019 the best estimate of total TB incidence for India  
6 is 199 cases per 100,000 population which translates to around 9.9 cases of MDR-TB per 100000  
7 population annually.<sup>1</sup> However, the estimates of TB incidence and mortality for India are  
8 interim, pending results from the national TB prevalence survey planned for 2019/2020.  
9

10  
11 In 2016, the male to female ratio for TB stood between 1.07 to 2.25, with women accounting for  
12 40% of new cases. In our study, it was 3.5. Studies have shown that women may be diagnosed  
13 late or not diagnosed at all due to socio-cultural barriers such as high burden of household work,  
14 illiteracy, restricted mobility as well as lack of autonomy. There is also a high level of stigma  
15 associated with the disease among unmarried females. In addition, malnutrition, especially  
16 anemia is prevalent in more than half of the women in India. All this increases the risk of TB  
17 disease in women.<sup>13</sup>

18  
19 In 2010, the World Health Organization (WHO) recommended the GeneXpert MTB/RIF assay  
20 for initial diagnosis of MDR-TB or HIV-associated tuberculosis.<sup>14</sup>In 2014, WHO expanded this  
21 recommendation for use in all patients. The accuracy of the MTB/RIF test to detect the presence  
22 of tuberculosis in smear-positive cases has been reported to be between 98% to 100%. For smear  
23 negative specimens, Zeka et al have reported sensitivities of 68.6% and 47.7% in pulmonary and  
24 extrapulmonary samples respectively.<sup>15</sup>In the present study, the sensitivity of the test was nearly  
25 87% and it rose to 100% for smear-positive specimens. In all studies, the sensitivity of the  
26 MTB/RIF test for pulmonary specimens is higher than that for extrapulmonary specimens which  
27 may or may not be statistically significant as reported by various authors.<sup>16</sup>This could be because  
28 of the high smear-negative rate for non-respiratory specimens. Sixty nine specimens that were  
29  
30  
31  
32  
33  
34  
35  
36  
37  
38  
39  
40  
41  
42  
43  
44  
45  
46  
47  
48  
49  
50  
51  
52  
53  
54  
55  
56  
57  
58  
59  
60

1  
2  
3 culture positive tested negative by the GeneXpert assay in our study (Table 2) resulting in a  
4 specificity of 61.6% (69/112). All these samples were smear negative. We also detected 413 cases  
5 (40% of 1032 positives) by the GeneXpert assay that were missed by both smear as well as  
6 culture. Xpert achieved higher diagnostic yield than microscopy and increased TB case finding  
7 by a factor of about 2. Boehme et al in a performance study on the use of the Xpert MTB/RIF  
8 test for diagnosis of tuberculosis and multidrug resistance concluded that use of this test reduced  
9 the median time to detection and treatment for smear-negative tuberculosis from 56 days to 5  
10 days.<sup>17</sup> In another study by Kim et al, on 321 patients the turn around time (TAT) for treatment  
11 between patients diagnosed with rifampicin-resistant TB using the Xpert assay and those  
12 diagnosed without the assay (phenotypic DST group) were compared.<sup>18</sup> It was 64 vs. 2 days ( $p <$   
13 0.001) from initial evaluation to commencing second-line anti-tuberculosis  
14 treatment. Using phenotypic DST as the gold standard, Xpert sensitivity and specificity for  
15 diagnosis of rifampicin resistance was 100% and 98.7% respectively.

16  
17  
18  
19  
20  
21  
22  
23  
24  
25  
26  
27  
28  
29  
30  
31  
32  
33 The overall rate of resistance to rifampicin in our study was 21.6%. Goyal et al published a recent  
34 systematic review of 75 epidemiological studies for the prevalence of DRTB in India across 2  
35 decades, from 1995 to 2015.<sup>19</sup> Comparative analysis revealed a worsening trend in DR-TB  
36 between the two study decades, 37.7% vs 46.1% respectively. The prevalence of pre-XDR TB  
37 was 7.9% with 66.3% resistance to fluoroquinolones.

38  
39  
40  
41  
42  
43  
44  
45  
46  
47  
48  
49  
50  
51  
52  
53  
54  
55  
56  
57  
58  
59  
60  
It is estimated that in India, by 2032, 85% of multidrug-resistant tuberculosis infections would be  
from primary transmission, compared with only 15% in 2012.<sup>19</sup> In the *Lancet Public Health*,  
Law et al have created a dynamic model of the tuberculosis epidemic in India, which they use to  
estimate the incidence of drug susceptible tuberculosis and multidrug-resistant tuberculosis over  
the next 20 years.<sup>19</sup> They have analyzed the emergence of drug resistance in all major health-care

1  
2  
3 sectors in India including the country's burgeoning private sector. Private clinics in India are  
4 often used by patients seeking TB treatment and they administer regimens that are not  
5 recommended by standard guidelines. This not only results in suboptimal outcome but also  
6 potentially generates MDR TB. They conclude that as multidrug resistant tuberculosis transitions  
7 from an acquired condition to a primarily transmitted disease, improving the effectiveness of  
8 drug-susceptible tuberculosis treatment can no longer contain the spread of the epidemic. This  
9 epidemiological shift has profound resource implications since the cost of treatment of  
10 multidrug-resistant tuberculosis treatment can exceed that of first-line tuberculosis therapy by a  
11 factor of ten or more. A robust public health response is needed which includes a strong  
12 surveillance system, drug susceptibility testing for all patients with tuberculosis and rapid  
13 linkage to effective treatment throughout the course of the disease.  
14  
15  
16  
17  
18  
19  
20  
21  
22  
23  
24  
25  
26  
27

28 In a similar study, Suen et al sought to evaluate the effectiveness of two disease control strategies  
29 on reducing the prevalence of MDR TB in India.<sup>21</sup> One by improving treatment of non-MDR TB  
30 cases and second by shortening the infectious period between activation of MDR TB and  
31 initiation of effective treatment. They examine the implication of India's MDR TB epidemic  
32 from 1996-2038 for the effectiveness of public health interventions by using a dynamic  
33 transmission model calibrated to Indian demography and epidemiology. They have concluded  
34 that strategies that disrupt MDR transmission by shortening the time between MDR activation  
35 and treatment are projected to provide greater reductions in MDR prevalence compared with  
36 improving non-MDR treatment quality.  
37  
38  
39  
40  
41  
42  
43  
44  
45  
46  
47  
48

49 In our study, we could put up SLD testing for only 62 cases (27.8%) out of 223 i.e. less than  
50 30%. The remaining cases were either sterile on culture or had inadequate volume of sample to  
51 put up the test directly. The PMDT guidelines in India outline the steps of specimen referral for  
52  
53  
54  
55  
56  
57  
58  
59  
60

1  
2  
3 TB patients in the government sector in India for both first and second line DST by LPA.<sup>4</sup>As per  
4 the operational process, two fresh sputum specimens need to be collected at designated collection  
5 centers by trained personnel and transported in a cool chain on the same day to the nearest  
6  
7  
8  
9  
10  
11  
12  
13  
14  
15  
16  
17  
18  
19  
20  
21  
22  
23  
24  
25  
26  
27  
28  
29  
30  
31  
32  
33  
34  
35  
36  
37  
38  
39  
40  
41  
42  
43  
44  
45  
46  
47  
48  
49  
50  
51  
52  
53  
54  
55  
56  
57  
58  
59  
60

CBNAAT lab for all eligible patients. At the CB-NAAT sites one specimen will be utilized to perform Gene Xpert assay and the second specimen will be transported to LPA lab for either first line (FL) testing if INH resistance is suspected or second line (SL) DST. At the LPA lab, the second specimen will be tested as applicable and processed further for Liquid Culture DST. Out of 62 cases put up for SLD testing in our study, only 14 were sensitive to both second line agents. Nearly 77.4% cases were resistant to FQs. FQ resistance is a defining feature of extensively drug-resistant Tuberculosis (XDR-TB). A recent study from India, assessed the proportion of rifampin-resistant TB patients in the state of Uttar Pradesh who would be eligible for a shorter regimen under the NTEP setting.<sup>22</sup> Of 541 conclusive LPA-SLD results, the proportion of strains resistant to only fluoroquinolone was 50.1% while 8.3% were resistant to both fluoroquinolones and SLIDs. Eleven cases in our study were extensively drug resistant. According to the data reported on XDR-TB from India, it varied from 0.3 to 60 per cent of MDR-TB cases.<sup>2</sup> The results of our study underscore the fact that resistance to second-line anti-tubercular drugs should be routinely assessed in areas endemic for TB. In another study by Chee et al, from Singapore, only 30% of patients with MDR-PTB from South-east Asia were eligible for the WHO shorter MDR-TB treatment regimen.<sup>23</sup>

The high rates of drug resistance observed in the present study may be due to the fact that ours is a tertiary care hospital and we see patients after the referring hospital has already tried and failed to control infection using a combination of different anti-tubercular agents. Moreover, facilities for microbiological studies at the first contact physician/surgeon are usually not available in

1  
2  
3 district hospitals/smaller cities in India. Indiscriminate antimicrobial therapy, without establishing  
4 the etiology of infection results in incomplete treatment and misdiagnosis. In addition, many of  
5 these antimicrobial agents have antitubercular activity also. McDowell and Pai in an  
6 ethnographic study on the mismanagement of empirical TB treatment in India showed that all  
7 non-specialist private practitioners began antibiotic treatment, especially quinolones, for  
8 persistent cough before prescribing a test.<sup>24</sup>

9  
10 Subbaraman et al in a systematic review and meta-analysis have created a ‘cascade of care’  
11 model that focuses on the government run national programme, NTEP (previously known as  
12 RNTCP).<sup>25</sup> The purpose of their study was to estimate how many TB patients in India’s national  
13 TB program are not being detected, not enrolling for treatment, not completing treatment, and  
14 not surviving without TB recurrence for 1-y after completing treatment. The results of their study  
15 show that pre-treatment loss to follow-up of diagnosed patients and post-treatment TB recurrence  
16 were major points of attrition in the new smear-positive TB cascade. Out of 2,700,000 prevalent  
17 TB patients in India only 39% achieved the optimal outcome of 1-y recurrence-free survival.

## 35 CONCLUSION

36  
37 In conclusion, we have not come across any study from India performed on such a large number  
38 of pulmonary as well as extrapulmonary samples performed by both conventional and molecular  
39 methods. Our study provides comprehensive data on the burden of drug resistant TB in India at a  
40 1200 bed tertiary care centre. The Sustainable Development Goal (SDG) target to end the  
41 tuberculosis epidemic by 2030 seems bleak. Notification data from low-income and middle-  
42 income countries, are prone to under-reporting and cannot be interpreted without additional  
43 information on case detection rate. The DR-TB diagnostic algorithm as given in the PMDT  
44 guidelines recommends SL – LPA testing for all RR TB cases diagnosed by the CBNAAT assay.



1  
2  
3 However, it is labor intensive and requires trained manpower .Severe lack of Microbiology  
4 laboratories providing universal DST and visual interpretation of bands is a huge limitation  
5  
6 especially in smear negative and extra-pulmonary cases with inadequate sample volumes as has  
7  
8 been our experience even with version 2 of the test. The treatment algorithm recommends the  
9  
10 shorter MDR TB regimen in all pulmonary cases of RR TB patients. However, the exclusion  
11  
12 criterion is second-line drug resistance. Our data shows that out of 62 cases, 77% patients were  
13  
14 resistant to fluoroquinolones. Though notification of all TB cases has been made mandatory by a  
15  
16 gazette circular issued by the government in March 2018, the ‘missing million’ still remains a  
17  
18 huge challenge. Our data provide a strong rationale for the implementation of evidence based  
19  
20 strategies such as strengthening of laboratories, involvement of private sector, active case finding  
21  
22 and strict compliance of treatment by directly observed therapy.  
23  
24  
25  
26  
27

28 **Contributors** RM drafted the manuscript. VK compiled the data. All authors critically revised  
29  
30 the manuscript, gave final approval and agreed to be accountable for all aspects of work.  
31  
32

33 **Funding** None  
34

35 **Competing interests** None declared.  
36  
37

38 **Patient consent for publication** Not required  
39

40 **Ethics approval** The study protocol was approved by the ethics committee of the Institute.  
41

42 **Data availability statement** Data may be obtained by e mailing drricha1976@gmail.com  
43  
44  
45  
46  
47  
48  
49  
50  
51  
52  
53  
54  
55  
56  
57  
58  
59  
60

## References

1. World Health Organization. Global tuberculosis report 2018 [cited 2019 Jun24].  
[https://www.who.int/tb/publications/global\\_report](https://www.who.int/tb/publications/global_report)
2. Chatterjee S, Poonawala H, Jain Y. Drug resistant tuberculosis: is India ready for the challenge? *BMJ Glob Health* 2018;3:e000971
3. Natrajan M, Sridhar R, Narendran G, Ramachandran G, Viswanathan V K, Tripathy S. Crusade for TB. *Indian J Med Res* 2019; 149 (Supplement): 89-93.
4. Programmatic Management of Drug Resistance, 2017. Guidelines on programmatic management of drug resistant tuberculosis in India 2017: Central TB Division, Directorate General of Health Services, Government of India; 2018 [cited 2019 Jun24].
5. Van Deun A, Maug AKJ, Salim MAH, Das PK, Sarker R, Daru P, Rieder HL. Short, highly effective, and inexpensive standardized treatment of multidrug-resistant tuberculosis. *Am J Respir Crit Care Med*. 2010;182: 684–92.
6. Kuaban C, Noeske J, Rieder HL, Ait-Khaled N, Foe JLA, Trebucq A. High effectiveness of a 12-month regimen for MDR-TB patients in Cameroon. *Int J Tuberc Lung Dis*. 2015;19: 517–24.
7. Piubello A, Harouna SH, Souleymane MB, et al. High cure rate with standardized short-course multidrug-resistant tuberculosis treatment in Niger: no relapses. *Int J Tuberc Lung Dis*. 2014; 18:1188–94.

- 1  
2  
3 8. Parsons Linda M, Somoskövi A, Gutierrez C, et al. Laboratory Diagnosis of  
4 Tuberculosis in Resource-Poor Countries: Challenges and Opportunities. ClinMicrobiol  
5 Rev.2011; 24:314-50.  
6  
7
- 8  
9  
10 9. Definitions and reporting framework for tuberculosis – 2013 revision (updated December  
11 2014 and January 2020), WHO. ([www.who.int](http://www.who.int)).  
12  
13
- 14  
15 10. Knight G, McQuaid C, Dodd P, Houben R. Global burden of latent multidrug-resistant  
16 tuberculosis: trends and estimates based on mathematical modelling. Lancet Infect Dis.  
17 2019; 19: 903–12.  
18  
19
- 20  
21 11. Kyu H, Maddison E, Henry J, et al.Global, regional, and national burden of tuberculosis,  
22 1990–2016: results from the Global Burden of Diseases, Injuries, and Risk Factors 2016  
23 Study. Lancet Infect Dis.2018; 18: 1329–49.  
24  
25
- 26  
27 12. Grobusch M, Kapata N .Global burden of tuberculosis: where we are and what to do.  
28 Lancet infect Dis. 2018;18: 1291-93.  
29  
30
- 31  
32 13. Amitapitre. A Rapid Gender Assessment of Tuberculosis in India.2018.  
33  
34
- 35  
36 14. Lawn SD, Nicol MP. Xpert® MTB/RIF assay: development, evaluation and  
37 implementation of a new rapid molecular diagnostic for tuberculosis and rifampicin  
38 resistance.FutureMicrobiol. 2012; 7:1024.  
39  
40
- 41  
42 15. Zeka A, Tasbakan S, Cavusoglu C. Evaluation of the GeneXpert MTB/RIF Assay for  
43 Rapid Diagnosis of Tuberculosis and Detection of Rifampin Resistance in Pulmonary and  
44 Extrapulmonary Specimens. J ClinMicrobiol.2011; 49: 4138–41.  
45  
46
- 47  
48 16. Marlowe E, Novak-Weekley S, CumpioJ,et al.Evaluation of the Cepheid Xpert MTB/RIF  
49 assay for direct detection of *Mycobacterium tuberculosis* complex in respiratory  
50 specimens. J ClinMicrobiol. 2011;49:1621–23.  
51  
52  
53  
54  
55  
56  
57  
58  
59  
60

17. Boehme C, Nicol M, Nabeta P, et al. Feasibility, diagnostic accuracy, and effectiveness of decentralised use of the Xpert MTB/RIF test for diagnosis of tuberculosis and multidrug resistance: a multicentre implementation study. *Lancet*. 2011;377: 1495–05.
18. Kim YW, Seong M-W, Kim TS, Yoo CG, Kim YW, Han SK, Yim JJ. Evaluation of Xpert MTB/RIF assay: diagnosis and treatment outcomes in rifampicin-resistant tuberculosis. *Int J Tuberc Lung Dis*. 2015;19:1216–2.
19. Goyal V, Kadam V, Narang P, Singh V. Prevalence of drug-resistant pulmonary tuberculosis in India: systematic review and meta-analysis. *BMC Public Health*. 2017; 17:817
20. Law S, Piatek A, Vincent C, Oxlade O, Menzies D. Emergence of drug resistance in patients with tuberculosis cared for by the Indian health-care system: a dynamic modelling study. *Lancet Public Health*. 2017;2: e47–55.
21. Suen S, Bendavid E, Jeremy D, Fiebert G. Disease Control Implications of India's Changing Multi-Drug Resistant Tuberculosis Epidemic. *PLoS ONE*. 2014; 9: e89822.
22. Singh PK, Jain A. Limited scope of shorter drug regimen for MDR TB caused by high resistance to fluoroquinolone. *Emerg Infect Dis*. 2019; 25: 1760–62.
23. Chee CBE, Khin Mar K-W, Sng L-H, et al. The shorter multidrug-resistant tuberculosis treatment regimen in Singapore: are patients from South-East Asia eligible? *Eur Respir J*. 2017; 50:170075
24. McDowell A, Pai M. Treatment as diagnosis and diagnosis as treatment: empirical management of presumptive tuberculosis in India. *Int J Tuberc Lung Dis*. 2016; 20:536–43.

1  
2  
3 25. Subbaraman, R, Nathavitharana R, Satyanarayana S et al. The Tuberculosis Cascade of  
4 Care in India's Public Sector: A Systematic Review and Metaanalysis. PLOS Medicine.  
5  
6  
7  
8 2016; DOI:10.1371/journal.pmed.1002149: 1–38.  
9  
10  
11

12 **Table 1.** Smear and culture results among samples positive by Xpert MTB /RIF assay (n=1032)  
13  
14  
15  
16

| 17 <b>Sample (N=1032)</b>        | 18 <b>Smear positive (%)</b> | 19 <b>Culture positive (%)</b> |
|----------------------------------|------------------------------|--------------------------------|
| 20 Pulmonary(n=706)              | 21 382(54.1%)                | 22 384(54.3%)                  |
| 23 Extra-<br>24 pulmonary(n=326) | 25 125(38.3%)                | 26 133(40.7%)                  |
| 27 Total                         | 28 507(49.1%)                | 29 517(50%)                    |

30  
31  
32  
33  
34  
35  
36  
37  
38  
39  
40  
41  
42  
43  
44  
45  
46  
47  
48  
49  
50  
51  
52  
53  
54  
55  
56  
57  
58  
59  
60

**Table 2:** Comparison of Gene Xpert MTB / RIF positive, MTB culture positive results with smear results

| SmearMTB culture +<br>Gene Xpert+ | MTB culture +<br>Gene Xpert- | MTB culture–<br>Gene Xpert+ | MTB culture–<br>Gene Xpert– | Total |      |
|-----------------------------------|------------------------------|-----------------------------|-----------------------------|-------|------|
| Positive                          | 336                          | 0                           | 171                         | 0     | 507  |
| Negative                          | 112                          | 69                          | 413                         | 1944  | 2538 |
| Total                             | 448                          | 69                          | 584                         | 1944  | 3045 |

1  
2  
3  
4  
5  
6  
7  
8  
9  
10  
11  
12 **Figure legends**  
13  
14  
15  
16

17 **Figure 1.** Age distribution of cases positive by Xpert MTB/ RIF assay (n=1032)  
18  
19  
20

21 **Figure 2.** Distribution of samples positive by the Xpert MTB/RIF assay (n=1032)  
22  
23  
24  
25

26 **Figure 3.** Results of conventional and molecular diagnostic testing by Xpert MTB/ RIF assay of  
27 samples included in the study (n=3045)  
28  
29  
30  
31  
32

33 **Figure 4.** Distribution of samples among rifampicin resistant cases (n=223)  
34  
35  
36  
37

38 **Figure 5:** Results for second line susceptibility testing performed by line probe assay (LPA)  
39  
40 version2  
41  
42  
43  
44  
45  
46  
47  
48  
49  
50  
51  
52  
53  
54  
55  
56  
57  
58  
59  
60

Figure 1

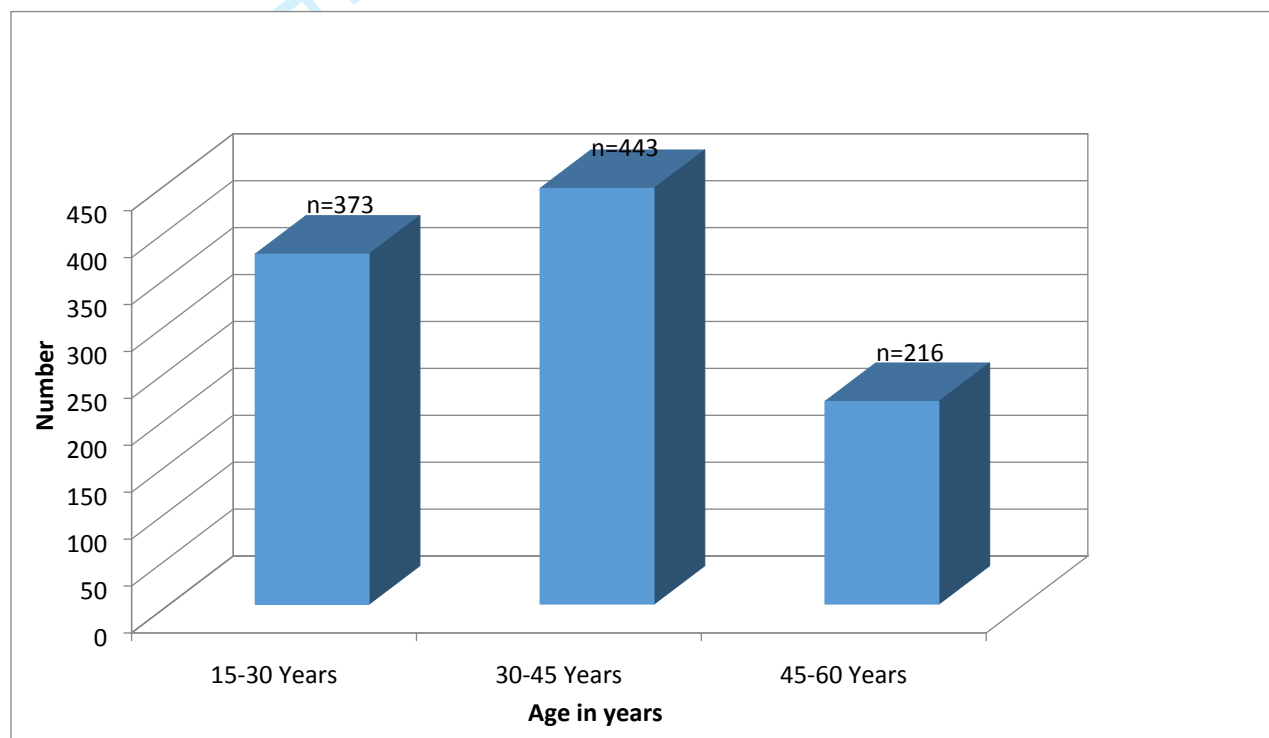



1  
2  
3  
4  
5  
6  
7  
8  
9  
10  
11  
12  
13  
14  
15  
16  
17  
18  
19  
20  
21  
22  
23  
24  
25  
26  
27  
28  
29  
30  
31  
32  
33  
34  
35  
36  
37  
38  
39  
40  
41  
42  
43  
44  
45  
46  
47  
48  
49  
50  
51  
52  
53  
54  
55  
56  
57  
58  
59  
60

Figure 2

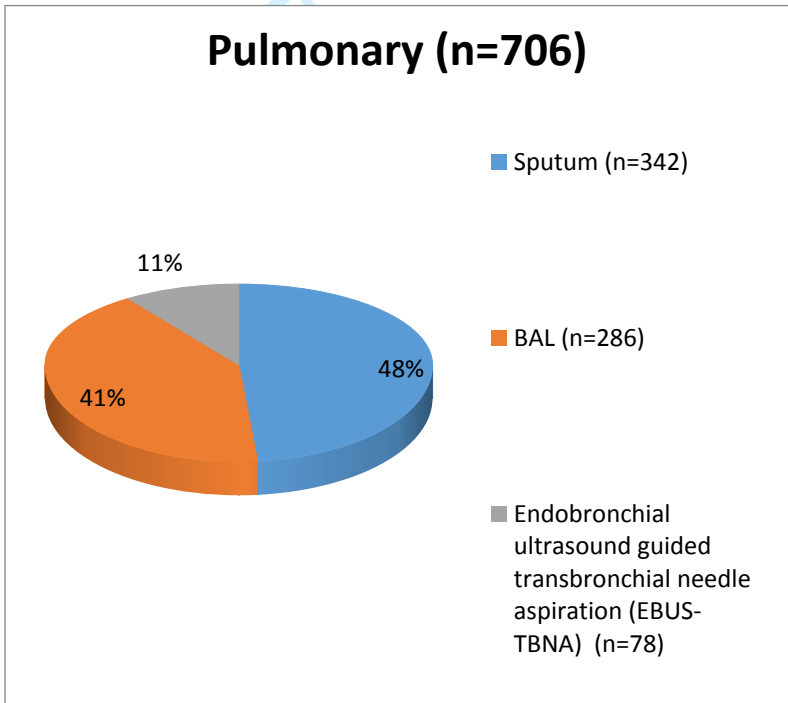

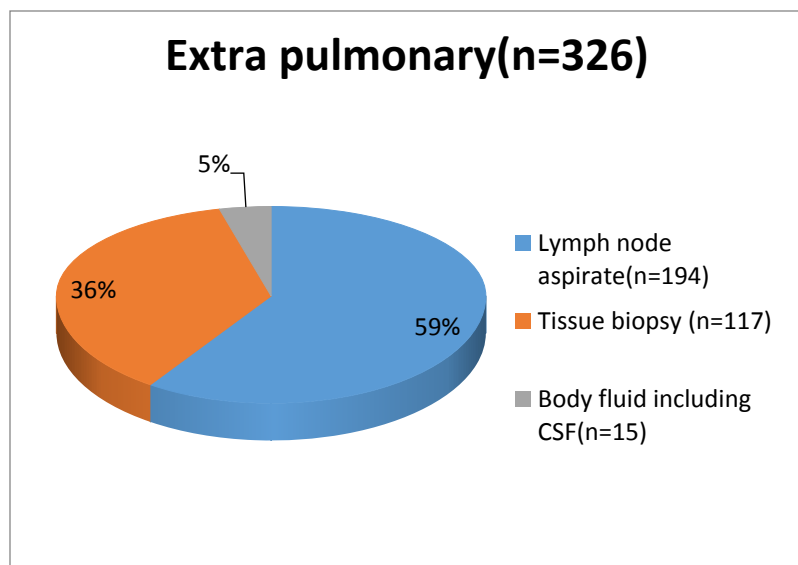

Figure 3

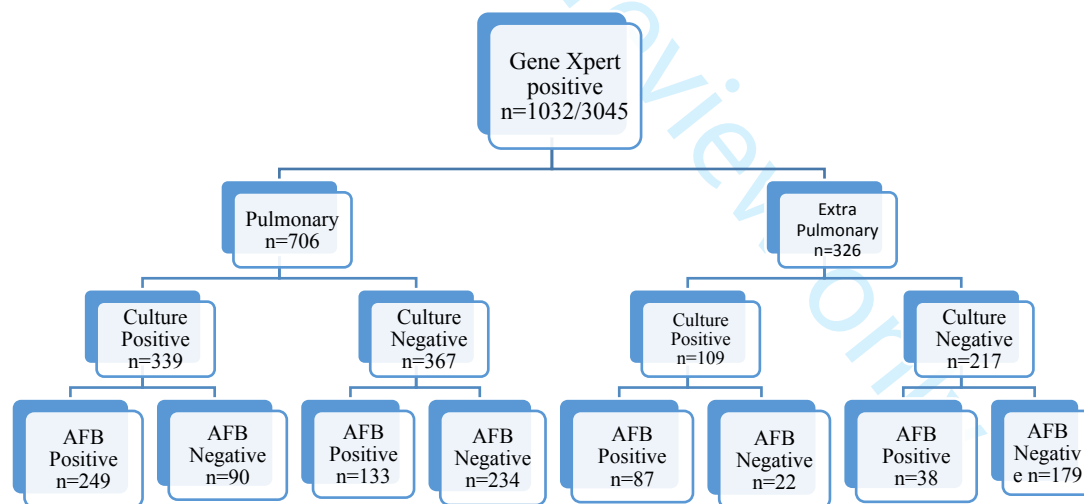

1  
2  
3  
4  
5  
6  
7  
8  
9  
10  
11  
12  
13  
14  
15  
16  
17  
18  
19  
20  
21  
22  
23  
24  
25  
26  
27  
28  
29  
30  
31  
32  
33  
34  
35  
36  
37  
38  
39  
40  
41  
42  
43  
44  
45  
46  
47  
48  
49  
50  
51  
52  
53  
54  
55  
56  
57  
58  
59  
60

For peer

Figure 4

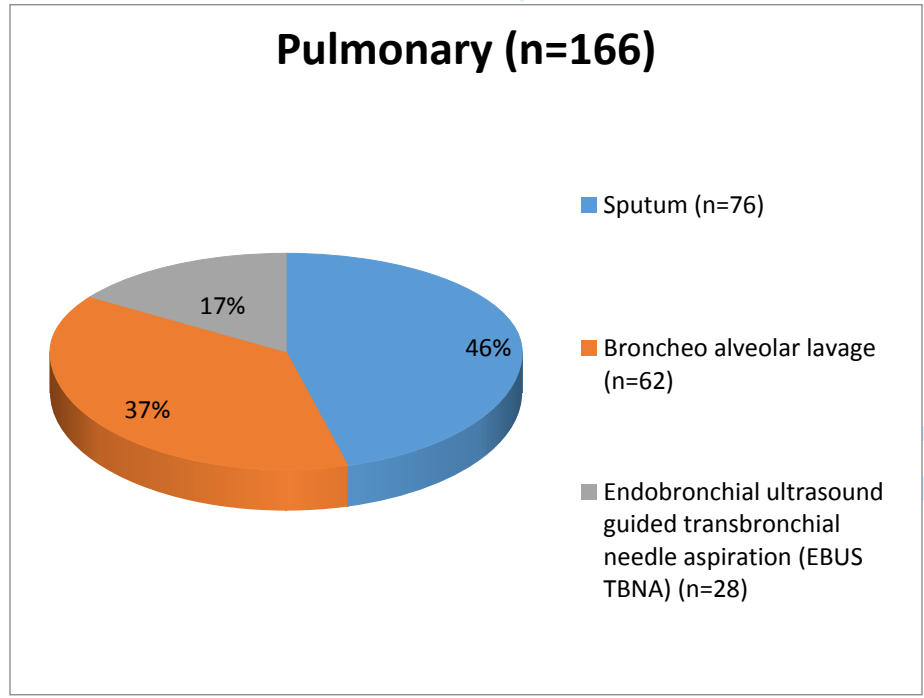

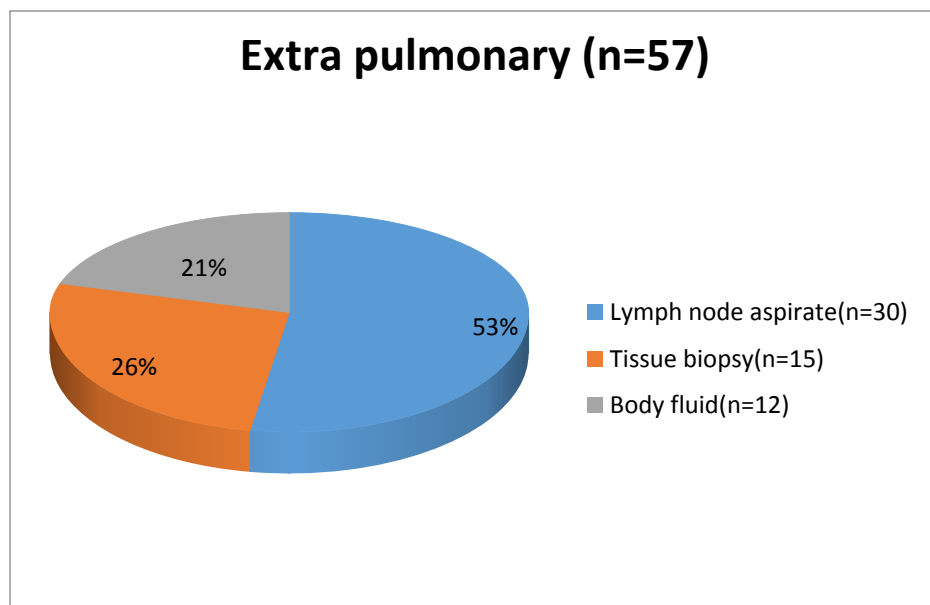

Figure 5

1  
2  
3  
4  
5  
6  
7  
8  
9  
10  
11  
12  
13  
14  
15  
16  
17  
18  
19  
20  
21  
22  
23  
24  
25  
26  
27  
28  
29  
30  
31  
32  
33  
34  
35  
36  
37  
38  
39  
40  
41  
42  
43  
44  
45  
46  
47  
48  
49  
50  
51  
52  
53  
54  
55  
56  
57  
58  
59  
60

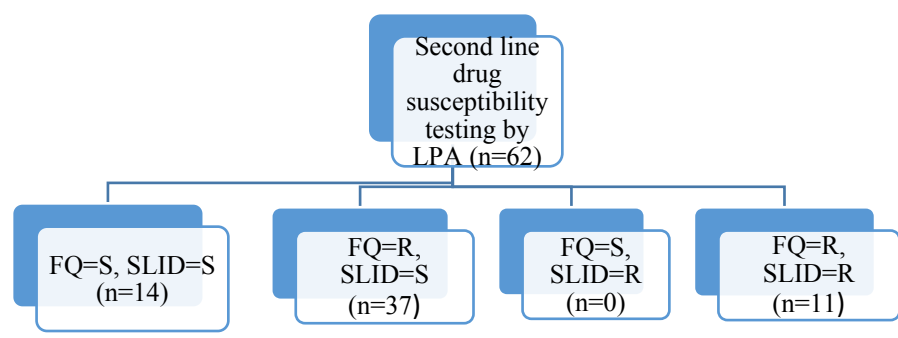

**S = Sensitive; R = Resistant; FQ = Fluoroquinolones; SLID = Second line injectable drugs**

# BMJ Open

## Assessment of burden of drug –resistant tuberculosis at a tertiary care centre in northern India: a community-based prospective single centre cohort study

|                                 |                                                                                    |
|---------------------------------|------------------------------------------------------------------------------------|
| Journal:                        | <i>BMJ Open</i>                                                                    |
| Manuscript ID                   | bmjopen-2020-044096.R1                                                             |
| Article Type:                   | Original research                                                                  |
| Date Submitted by the Author:   | 09-Mar-2021                                                                        |
| Complete List of Authors:       | Misra, Richa; SGPGIMS<br>Kesarwani, Vasudha ; SGPGIMS<br>Nath, Alok; SGPGIMS,      |
| <b>Primary Subject Heading</b>: | Epidemiology                                                                       |
| Secondary Subject Heading:      | Public health                                                                      |
| Keywords:                       | Tuberculosis < INFECTIOUS DISEASES, Epidemiology < TROPICAL MEDICINE, MICROBIOLOGY |
|                                 |                                                                                    |

SCHOLARONE™  
Manuscripts



I, the Submitting Author has the right to grant and does grant on behalf of all authors of the Work (as defined in the below author licence), an exclusive licence and/or a non-exclusive licence for contributions from authors who are: i) UK Crown employees; ii) where BMJ has agreed a CC-BY licence shall apply, and/or iii) in accordance with the terms applicable for US Federal Government officers or employees acting as part of their official duties; on a worldwide, perpetual, irrevocable, royalty-free basis to BMJ Publishing Group Ltd ("BMJ") its licensees and where the relevant Journal is co-owned by BMJ to the co-owners of the Journal, to publish the Work in this journal and any other BMJ products and to exploit all rights, as set out in our [licence](#).

The Submitting Author accepts and understands that any supply made under these terms is made by BMJ to the Submitting Author unless you are acting as an employee on behalf of your employer or a postgraduate student of an affiliated institution which is paying any applicable article publishing charge ("APC") for Open Access articles. Where the Submitting Author wishes to make the Work available on an Open Access basis (and intends to pay the relevant APC), the terms of reuse of such Open Access shall be governed by a Creative Commons licence – details of these licences and which [Creative Commons](#) licence will apply to this Work are set out in our licence referred to above.

Other than as permitted in any relevant BMJ Author's Self Archiving Policies, I confirm this Work has not been accepted for publication elsewhere, is not being considered for publication elsewhere and does not duplicate material already published. I confirm all authors consent to publication of this Work and authorise the granting of this licence.

1  
2  
3 **TITLE PAGE**  
4

5  
6 **Title:** Assessment of burden of drug –resistant tuberculosis at a tertiary care centre in  
7  
8 northern India: a community-based prospective single centre cohort study  
9

10  
11 **Authors and affiliations:** RichaMisra<sup>a</sup>, VasudhaKesarwani<sup>a</sup>, Alok Nath<sup>\*b</sup>  
12

13  
14 <sup>a</sup>MD, Department of Microbiology, Division Mycobacteriology, Sanjay Gandhi Post-  
15  
16 graduate Institute of Medical Sciences,Lucknow-226014,India  
17

18  
19 <sup>b</sup>MD, DM, Department of Pulmonary Medicine, Sanjay Gandhi Post-graduate Institute of  
20  
21 Medical Sciences,Lucknow-226014,India  
22

23  
24  
25 **\*Corresponding author:** Dr. Alok Nath, Professor, Department of Pulmonary Medicine,  
26  
27 Sanjay Gandhi Post-graduate Institute of Medical Sciences, Lucknow-226014, India.  
28

29  
30  
31 **Corresponding author E mail:**  
32

33  
34 [draloksgpgi@gmail.com](mailto:draloksgpgi@gmail.com)  
35

36  
37 Phone: +919839070065  
38

39  
40 Word count text: 3133  
41  
42  
43  
44  
45  
46  
47  
48  
49  
50  
51  
52  
53  
54  
55  
56  
57  
58  
59  
60



## 22 Abstract

23 **Objectives:** We aim to define the burden of rifampicin monoresistant tuberculosis at a  
24 tertiary care centre in Northern India as well as determine the second line drug susceptibilities  
25 in a subset of patients.

26 **Methods:** A total of 3045 pulmonary (n=1883) and extra-pulmonary (n=1162) samples from  
27 suspected tuberculosis patients were subjected to microscopy, culture and the Xpert  
28 MTB/RIF assay from March 2017 to June 2019. Second line drug susceptibility testing by  
29 version 2 Line Probe Assay for fluoroquinolones (FQs) and second line injectable drugs  
30 (SLIDs) was performed on 62 samples.

31 **Results:** Out of 3045 samples processed in our lab during the study period, 36.1%  
32 (1101/3045) were positive for MTBC and 21.6% were rifampicin mono-resistant (223/1032).  
33 The rate of rifampicin resistance in pulmonary samples was 23.5% (166/706) and in  
34 extrapulmonary cases it was 17.4% (57/326). Out of 62 cases included for second line testing,  
35 48 were resistant to FQs (77.4%) while 11 were extensively drug resistant (XDR).

36 **Conclusions:** India urgently needs to arrest an emerging multidrug-resistant tuberculosis  
37 epidemic with associated resistance to fluoroquinolones. A robust surveillance system is  
38 needed to execute the National strategic Plan (NSP) for 2017-2025.

39  
40 **Keywords:** Tuberculosis; Multi-drug resistant; Xpert MTB/RIF assay; Line Probe Assay

1  
2  
3 47  
4  
5 48  
6 **Article summary section**  
7  
8 49  
9  
10 50  
11  
12 51  
13  
14 52  
15  
16  
17 53  
18  
19 54  
20  
21 55  
22  
23 56  
24  
25 57  
26  
27 58  
28  
29 59  
30  
31 60  
32  
33 61  
34  
35 62  
36  
37 63  
38  
39 64  
40  
41 65  
42  
43 66  
44  
45 67  
46  
47 68  
48  
49 69  
50  
51 70  
52  
53  
54  
55  
56  
57  
58  
59  
60

### **Strengths and limitations of this study**

- Study has a large sample size of 3045 samples.
- 1162 extrapulmonary samples have been included such as EBUS-TBNA and biopsies
- Both Xpert MTB/RIF assay and Line probe assay have been performed
- MGIT-DST was not performed
- DNA sequencing was not done on drug-resistant isolates

## 71 INTRODUCTION

72 India has the highest Tuberculosis (TB) burden in the world and is home to 27% of the  
73 world's estimated 10.4 million annual tuberculosis cases.<sup>1,2,3</sup> The menace of drug resistant-  
74 TB (DR-TB), prompted the government to initiate the programmatic management of drug  
75 resistant TB (PMDT) in 2007 which integrates all programme based strategies for DR-TB  
76 diagnosis, management and treatment under the NTEP, National Tuberculosis Elimination  
77 Programme (renamed in December 2019)<sup>4</sup>. India also has a complex as well as unorganized  
78 health-care system which includes the government sector, private sector and informal health  
79 care providers practicing non-allopathic schools of medicine such as ayurveda and  
80 homeopathy<sup>2</sup>. Though TB was made a notifiable disease in 2012, less than 40% cases from  
81 the private sector were notified to the government in 2017<sup>3</sup>.

82 The shorter drug regimen of 9-12 months for MDR-TB patients was introduced by World  
83 Health Organization (WHO), in May 2016 and updated in June 2020.<sup>5,6</sup> It was recommended  
84 in patients who have not been previously treated with second-line drugs and in whom  
85 resistance to fluoroquinolones and second-line injectable agents has been excluded. However,  
86 drug susceptibility testing in India is technically challenging and requires specialist  
87 laboratory facilities and personnel that are still not widely available in the country.<sup>4</sup>

88 With this background, we aim to define the burden of rifampicin mono-resistant tuberculosis  
89 at a tertiary care referral medical center in northern India as well as determine the second line  
90 drug susceptibilities in a subset of patients.

## 91 METHODS

### 92 Study design and setting

93 This prospective observational study between March 2017 to June 2019 was conducted in the  
94 Mycobacteriology section of the Department of Microbiology at Sanjay Gandhi Postgraduate

1  
2  
3 95 Institute of Medical Sciences, a 1200 bed tertiary care referral medical center in northern  
4  
5 96 India. Institutional ethics committee of Sanjay Gandhi Postgraduate Institute of Medical  
6  
7 97 Sciences (SGPGIMS) approved the study protocol (IEC code 2017-37-IMP-EXP) and waiver  
8  
9 98 of consent was obtained.  
10  
11  
12

### 13 99 **Clinical specimens**

14  
15 100 Three thousand forty five pulmonary and extrapulmonary samples (930 sputum, 752  
16  
17 101 bronchoalveolar lavage, 146 EBUS-TBNA (endobronchial ultrasound with real-time guided  
18  
19 102 transbronchial needle aspiration), 54 bronchial/tracheal aspirate, 429 lymph node aspirates/  
20  
21 103 Fine Needle Aspiration Cytology(FNAC), 367 biopsies, 338 pus and 29 CSF were collected  
22  
23 104 between March 2017 and June 2019 during the clinical routine. All samples were divided into  
24  
25 105 2 portions on receipt in the laboratory. One aliquot was used to perform the Xpert MTB/RIF  
26  
27 106 assay while microscopy and culture was performed from the remaining sample. Direct smears  
28  
29 107 were prepared from the specimens using Ziehl-Neelsen staining. All non-sterile clinical  
30  
31 108 samples were processed using the *N*-acetyl-L-cysteine-sodium citrate-NaOH (NALC-NaOH)  
32  
33 109 method. Samples were decanted following centrifugation, and sediments were re-suspended  
34  
35 110 in 3 ml of phosphate buffer solution. Processed samples were used to inoculate either  
36  
37 111 Lowenstein-Jensen (LJ) solid medium or BacT/Alert culture. Line probe assay *version2*  
38  
39 112 (LPA<sub>v2</sub>) for second line testing was performed on either direct clinical samples if volume  
40  
41 113 was adequate or on positive culture. Both Xpert MTB/RIF assay and LPA<sub>v2</sub> were performed  
42  
43 114 according to the manufacturer's protocol.  
44  
45 115 All cases detected positive by the Xpert MTB/RIF assay were grouped into (i) those with  
46  
47 116 smear-positive and culture positive tuberculosis; (ii) those with smear-negative, culture-  
48  
49 117 positive tuberculosis; (iii) those who were both smear and culture negative for tuberculosis  
50  
51 118 but who were nonetheless treated for tuberculosis on the basis of clinical, pathological, and/or  
52  
53 119 radiological findings (clinical tuberculosis).  
54  
55  
56  
57  
58  
59  
60

1  
2  
3 120 There was a sub group of samples that were culture positive but missed by the Xpert  
4  
5 121 MTB/RIF assay. We put up the TB Ag MPT64 Rapid test (SD BIOLINE) on all these  
6  
7  
8 122 positive cultures.  
9

### 10 11 123 **Data collection**

12  
13 124 The medical records of patients were retrieved from the Hospital Information System. A  
14  
15 125 senior resident extracted patient data prospectively from charts.

### 16 17 126 **Classifications and definitions including RR-TB/MDR-TB/XDR-TB(rifampicin** 18 19 20 127 **resistant/multi-drug resistant/extensively drug resistant)<sup>7</sup>**

21  
22  
23 128 *Abacteriologically confirmed TB case:* One from whom a biological specimen was positive  
24  
25 129 by smear microscopy, culture or WRD (WHO approved rapid diagnostic test) such as Xpert  
26  
27  
28 130 MTB/RIF assay.

29  
30  
31 131 *Pulmonary tuberculosis (PTB):* Any bacteriologically confirmed or clinically diagnosed case  
32  
33 132 of TB involving lung parenchyma or tracheobronchial tree.

34  
35  
36 133 *Extrapulmonary tuberculosis (EPTB):* Any bacteriologically confirmed or clinically  
37  
38 134 diagnosed case of TB involving organs other than the lungs, e.g. pleura, lymph nodes,  
39  
40 135 abdomen, genitourinary tract, skin, joints and bones, meninges. Concomitant pulmonary  
41  
42 136 lesions were ruled out in all cases by appropriate investigations and review of case files.

43  
44  
45  
46 137 *Multidrug resistance TB (MDR):* A TB patient, whose biological specimen is resistant to both  
47  
48 138 H and R with or without resistance to other first-line anti-TB drugs.

49  
50  
51 139 *Pre-XDR-TB:* It is defined as TB with resistance to isoniazid and rifampicin and either a FQ  
52  
53 140 or a second-line injectable agent but not both.

54  
55  
56 141 *Extensive drug resistance (XDR):* A MDR-TB patient whose biological specimen  
57  
58 142 is additionally resistant to at least a FQ and a SLI anti-TB drug.  
59  
60

## 143 Patient and public involvement

144 Patients were involved in the reporting of our research in this study.

## 145 RESULTS

146 During the 27 month study period, 1883 pulmonary and 1162 extra-pulmonary specimens  
147 (n=3045) were subjected to the GeneXpert MTB/RIF assay in our laboratory along with  
148 concomitant smear and culture inoculation on the same sample. All duplicate isolates were  
149 excluded. One thousand thirty two (33.8%) samples (706 pulmonary, 326 extra-pulmonary)  
150 were detected for MTB complex. The assay failed to detect sixty nine samples that were  
151 culture positive. The MPT64 antigen test was positive on all these cultures. There were 806  
152 (78.10%) males and 226 (21.89%) females among the positive specimens. The median age of  
153 patients was 32 years and nearly 43% patients were young adults in the age group of 30-45  
154 years as shown in Figure 1. Lymph node aspirates/FNAC and tissue biopsy (including colonic  
155 biopsy) were the most common samples in extra-pulmonary cases that were positive. The  
156 sample distribution of positive specimens is shown in Figure 2. Out of 1032 samples detected  
157 positive by the CBNAAT assay, 507 and 517 specimens were smear and culture positive  
158 respectively. The rate of smear and culture positivity in pulmonary and extra-pulmonary  
159 cases was 54.1%, 54.3%, 38.3% and 40.7% respectively (Table-1). The results of  
160 conventional and molecular diagnostic testing by Xpert MTB/RIF assay of patients included  
161 in the study is shown in Figure 3.

162 During the study period, we also recovered 34 isolates of Non-tuberculous Mycobacteria  
163 (NTM) from various pus and respiratory specimens. These were *Mycobacterium abscessus*  
164 (n=15), *Mycobacterium intracellulare*(7), *Mycobacterium fortuitum* (6), *Mycobacterium*  
165 *gordonae*(n=3) and *Mycobacterium simiae*(n=3).

166 Rifampicin monoresistance was detected in 223 out of 1032 samples (21.6%). It was 23.5%  
167 (n=166/706) and 17.4% (57/326) in pulmonary and extra-pulmonary cases respectively

1  
2  
3 168 (Figure 4). A summary of the performance data is shown in Table 2. Five hundred and  
4  
5 169 seventeen samples were positive by culture resulting in an 86.6% agreement with the Xpert  
6  
7 170 MTB/RIF assay. The assay had a 100% agreement for culture positive, smear positive  
8  
9 171 specimens and 61.6% agreement for culture positive, smear negative specimens for the  
10  
11 172 detection of *Mycobacterium tuberculosis*. Sixty nine samples that were culture positive tested  
12  
13 173 negative by the Xpert MTB/RIF assay. We did not have any sample that was positive on both  
14  
15 174 smear and culture but was negative by Xpert MTB/RIF assay. As shown in Table 2, we  
16  
17 175 detected 413 more patients than we could have diagnosed by smear and/or culture alone.  
18  
19 176 Out of 223 rifampicin resistant cases, we could put up second line drug susceptibility testing  
20  
21 177 by LPA v2.0 for 62 cases (n=40, pulmonary and n=22, extra-pulmonary). As shown in Figure  
22  
23 178 5, majority of our patients (77.4%) were resistant to FLQs (n=48/62). Only 14 patients were  
24  
25 179 sensitive to both FLQ and SLID. Thirty seven cases were resistant to FQs only (Pre-XDR)  
26  
27 180 while 11 were resistant to both classes of drugs (XDR). We did not recover any isolate that  
28  
29 181 was aminoglycoside resistant but FLQ sensitive.

## 182 Discussion

183 Multidrug-resistant tuberculosis is one of the greatest public health challenges worldwide. To  
184 the best of our knowledge, ours is the first study from India to determine the burden of drug  
185 resistant tuberculosis by testing such a large number of pulmonary and extra-pulmonary  
186 clinical samples. As per WHO Global TB Report, 2020 the three countries with the largest  
187 share of the global burden were India (27%), China (14%) and the Russian Federation (8%)<sup>1</sup>.  
188 The results of the national anti-tuberculosis drug resistance survey has shown that the  
189 incidence of TB is highest in the 25–34 year age group in India<sup>8</sup>. We however documented a  
190 slightly higher age group in our study. Our cohort was dominated by males and nearly 43%  
191 patients were young adults in the age group of 30–45 years. The high frequency of the disease  
192 among the younger population may facilitate the transmission of TB in the community due to

1  
2  
3 193 greater mobility of youth. A gender analysis of the TB epidemic shows that TB affects  
4  
5 194 different genders differently. In 2016, about 40% of the 2.79 million new cases of TB in India  
6  
7  
8 195 were among women and the male to female ratio for TB stood between 1.07 to 2.25 with  
9  
10 196 women accounting for 40% of new cases. In our study, it was 3.5. Studies have shown that  
11  
12 197 women may be diagnosed late or not diagnosed at all due to socio-cultural barriers such as  
13  
14 198 high burden of household work, illiteracy, restricted mobility as well as lack of autonomy.  
15  
16  
17 199 There is also a high level of stigma associated with the disease among unmarried females<sup>9</sup>.  
18  
19 200 WHO's current policies and guidance recommend that the Xpert MTB/RIF assay may be  
20  
21 201 used as an initial diagnostic test in individuals suspected of having MDR-TB. About 36% of  
22  
23 202 the samples included in our study were positive for *Mycobacterium tuberculosis* complex and  
24  
25 203 the overall rate of resistance to rifampicin was 21.6%. We assessed the burden of tuberculosis  
26  
27 204 in a large cohort of consecutive patients in our hospital thereby eliminating any selection bias  
28  
29 205 in the study population. We also recovered 34 isolates of Non-tuberculous Mycobacteria  
30  
31 206 (NTM) from various samples and all these isolates were negative by the Xpert MTB/RIF  
32  
33 207 assay.  
34  
35  
36 208 In a study carried out in Mumbai, India's commercial capital and one of the most densely  
37  
38 209 populated and congested cities, Udwardia et al tested 1539 samples at a tertiary care private  
39  
40 210 hospital and reported MDR-TB in 30.14% of cases<sup>10</sup>. In another retrospective study from  
41  
42 211 South India, Shivekar et al performed the MTBDRplus assay on 20245 specimens obtained  
43  
44 212 from presumptive MDR-TB cases during a 6-year study period from 2013 to 2018. Based on  
45  
46 213 the *rhoB* gene, true resistance, hetero-resistance, and inferred resistance to rifampicin was  
47  
48 214 found in 38%, 29.3%, and 32.7% of the 1582 MDR cases, respectively.<sup>11</sup> Goyal et al  
49  
50 215 published a recent systematic review of 75 epidemiological studies for the prevalence of  
51  
52 216 DRTB in India across 2 decades, from 1995 to 2015. Comparative analysis revealed a  
53  
54 217 worsening trend in DR-TB between the two study decades, 37.7% vs 46.1% respectively. The  
55  
56  
57  
58  
59  
60



1  
2  
3 218 countrywide prevalence of MDR-TB also increased from the earlier decade at 14.9% to 27.9%  
4  
5 219 in decade 2.<sup>12</sup> However, the report of the first national anti-tuberculosis drug resistance survey  
6  
7 220 in India conducted during 2014-2016 concluded that among all TB patients tested, the MDR-  
8  
9 221 TB rate was 6.19% with 2.84% among new and 11.60% among previously treated TB  
10  
11 222 patients. The survey has probably under-estimated the true burden of resistance in India since  
12  
13 223 it excluded both smear-negative TB cases as well as extrapulmonary TB and did not include  
14  
15 224 the private sector.<sup>8</sup>

16  
17 225 We also attempted to find the overall agreement of the Xpert MTB/RIF assay compared to  
18  
19 226 culture in our study cohort. In the present study, the sensitivity of the test was nearly 87% and  
20  
21 227 it rose to 100% for smear-positive specimens. The accuracy of the MTB/RIF test to detect the  
22  
23 228 presence of tuberculosis in smear-positive cases has been reported to be between 98% to  
24  
25 229 100%.<sup>13</sup> For smear negative specimens, Zeka et al have reported sensitivities of 68.6% and  
26  
27 230 47.7% in pulmonary and extra-pulmonary samples respectively.<sup>14</sup> Sixty nine specimens that  
28  
29 231 were culture positive tested negative by the Xpert MTB/RIF assay in our study resulting in a  
30  
31 232 specificity of 61.6% (69/112). All these samples were smear negative. We also detected 413  
32  
33 233 cases (40% of 1032 positives) by the Xpert MTB/RIF assay that were missed by both smear  
34  
35 234 as well as culture. The assay achieved higher diagnostic yield than microscopy and increased  
36  
37 235 TB case finding by a factor of about 2.

38  
39 236 The results of second line testing in our study revealed 77.4% resistance to fluoroquinolones  
40  
41 237 among RR isolates which is higher than other studies reported from India. Sethi et al in a  
42  
43 238 retrospective study from a tertiary care center in northern India have documented an overall  
44  
45 239 rate of 38.6% FQ resistance among 863 rifampicin-resistant TB isolates.<sup>15</sup> In another study  
46  
47 240 from eight health care facilities in greater Mumbai between 2005 and 2013, Dalal et al  
48  
49 241 investigated the trends over time of patterns of drug resistance in a sample of MDR-TB  
50  
51 242 patients. Between 2005–2007 and 2011–2013, patients with ofloxacin and moxifloxacin  
52  
53  
54  
55  
56  
57  
58  
59  
60

1  
2  
3 243 resistance significantly increased from 57.6% to 75.3% and from 60.0% to 69.5% ( $p < 0.05$ ).<sup>16</sup>

4  
5 244 A meta-analysis by Ho et al has concluded that globally FQ resistance in MTB is largely

6  
7 245 confined to MDR strains and knowledge of the global extent of this resistance pattern is

8  
9 246 currently hampered by the absence of surveillance studies in the majority of regions where

10  
11 247 TB is endemic.<sup>17</sup>

12  
13 248 Updated WHO guidelines, published in June 2020, recommend that for patients with MDR-

14  
15 249 TB and additional fluoroquinolone resistance, a regimen composed of bedaquiline,

16  
17 250 pretomanid, and linezolid may be used under operational research conditions (6-9 months).<sup>5</sup>

18  
19 251 Chee et al in a study conducted between 2002-2016 on 280 patients have demonstrated that

20  
21 252 only about 30% of patients with MDR pulmonary TB diagnosed in their study cohort from

22  
23 253 South-east Asia were eligible for the WHO shorter MDR-TB treatment regimen.<sup>18</sup>In a similar

24  
25 254 study from northern India, Singh and Jain have explored the eligibility of the shorter regimen

26  
27 255 in MDR patients under the programmatic setting. Out of 541 conclusive LPA-SLD results, the

28  
29 256 proportion of strains resistant to only fluoroquinolones was nearly 50% while 8.3% were

30  
31 257 resistant to both fluoroquinolones and SLIDs.<sup>19</sup>Eleven cases in our study were extensively

32  
33 258 drug resistant.

34  
35 259 The high rates of drug resistance observed in our study may be due to the fact that ours is a

36  
37 260 tertiary care hospital in the state of Uttar Pradesh which has over 20% of the total number of

38  
39 261 notified cases of TB in India. We see patients after the referring hospital has already tried and

40  
41 262 failed to control infection using a combination of different anti-microbial agents. Since

42  
43 263 facilities for microbiological studies are usually not available in district hospitals/smaller

44  
45 264 cities in India, the first contact physician/surgeon/referral facility are compelled to initiate

46  
47 265 broad-spectrum antibiotics. Indiscriminate antimicrobial therapy without establishing the

48  
49 266 etiology of infection selects out the resistant strains. McDowell and Pai in an ethnographic

50  
51 267 study on the mismanagement of empirical TB treatment in India have demonstrated that all

1  
2  
3 268 non-specialist private practitioners began antibiotic treatment, especially quinolones, for  
4  
5 269 persistent cough before prescribing a test.<sup>20</sup>Their results underscore the fact that inappropriate  
6  
7 270 prescribing practices in India's burgeoning private sector including easy, over-the-counter  
8  
9 271 access to fluoroquinolones need to be halted as soon as possible.  
10  
11  
12 272 The alarming rate of drug resistance in our study to rifampicin as well as fluoroquinolones  
13  
14 273 has important implications for implementation of government strategies to control the TB  
15  
16 274 epidemic in India. Firstly, standardized regimens containing a FQ to treat MDR –TB cases  
17  
18 275 carry a high risk of being sub-optimal and resulting in treatment failure. Secondly, with such  
19  
20 276 high rates of drug resistance India will have to equip itself with enough Mycobacteriology  
21  
22 277 laboratories offering culture and drug susceptibility testing (C-DST) to both first as well as  
23  
24 278 second-line agents. Currently, the focus is to roll out sufficient number of GeneXpert  
25  
26 279 MTB/RIF assay machines to diagnose rifampicinresistant strains of *Mycobacterium*  
27  
28 280 *tuberculosis*. However, this strategy may mask the diagnosis of pre-XDR TB. A high rate of  
29  
30 281 FQ resistance has also been noted in newly diagnosed MDR/RR TB cases, which might be  
31  
32 282 due to transmission of the drug-resistant strains. <sup>15</sup>It is estimated that in India, by 2032, 85%  
33  
34 283 of multidrug-resistant tuberculosis infections would be from primary transmission, compared  
35  
36 284 with only 15% in 2012. In the *Lancet Public Health*, Law et al have created a dynamic model  
37  
38 285 of the tuberculosis epidemic in India, which they use to estimate the incidence of drug  
39  
40 286 susceptible tuberculosis and multidrug-resistant tuberculosis over the next 20 years<sup>2</sup>. They  
41  
42 287 have analyzed the emergence of drug resistance in all major health-care sectors in India.  
43  
44 288 Private clinics in India are often used by patients seeking TB treatment and they administer  
45  
46 289 regimens that are not recommended by standard guidelines. This not only results in  
47  
48 290 suboptimal outcome but also potentially generates MDR TB. They conclude that as multidrug  
49  
50 291 resistant tuberculosis transitions from an acquired condition to a primarily transmitted  
51  
52 292 disease, improving the effectiveness of drug-susceptible tuberculosis treatment can no longer  
53  
54  
55  
56  
57  
58  
59  
60

1  
2  
3 293 contain the spread of the epidemic. This epidemiological shift has profound resource  
4  
5 294 implications since the cost of treatment of multidrug-resistant tuberculosis treatment can  
6  
7  
8 295 exceed that of first-line tuberculosis therapy by a factor of ten or more.

9  
10 296 In addition, notification data from low-income and middle-income countries, are prone to  
11  
12 297 underreporting and cannot be interpreted without additional information on case detection  
13  
14 298 rate. The DR-TB diagnostic algorithm as given in the PMDT guidelines recommends SL –  
15  
16  
17 299 LPA testing for all RR TB cases diagnosed by the CBNAAT assay. However, it is labor  
18  
19 300 intensive and requires trained manpower. Severe lack of Microbiology laboratories providing  
20  
21 301 universal DST and visual interpretation of bands is a huge limitation especially in smear  
22  
23 302 negative and extra-pulmonary cases with inadequate sample volumes as has been our  
24  
25  
26 303 experience even with version 2 of the test.

27  
28 304 There were several limitations to this study. One of the methodological limitations of our  
29  
30 305 study was that we could not perform liquid culture DST as well as sequencing and confirm  
31  
32 306 the results of the drug resistant isolates. Another limitation was that we did not differentiate  
33  
34 307 between new and previously treated TB cases. Most of the DR-TB patients in our cohort at  
35  
36 308 the time of diagnosis were attached to the PMDT follow up for further evaluation and  
37  
38 309 management except for some who insisted on institutional management. We could therefore  
39  
40 310 put up SL-DST for only 62 cases. We also did not receive any grant for this study and hence  
41  
42 311 could not put up FL-LPA on the 69 culture positive isolates that tested negative by the Xpert  
43  
44 312 MTB/RIF assay. In addition, a study of risk factors in such a high burden setting would have  
45  
46  
47 313 allowed us to offer more useful remedies to policy makers.

## 51 314 **CONCLUSION**

52  
53 315 In conclusion, we have not come across any prospective study from India on such a large  
54  
55 316 number of pulmonary as well as extrapulmonary samples performed by both conventional  
56  
57 317 and molecular methods. Our study provides comprehensive data on the high burden of drug  
58  
59  
60

1  
2  
3 318 resistant TB in India at a 1200 bed tertiary care center in northern India. The need of the hour  
4  
5 319 is to have enough Mycobacteriology laboratories offering both first and second line DST  
6  
7 320 under the NTEP umbrella. The high rates of FQ resistance documented in our study should  
8  
9 321 prompt policy makers to tightly regulate them as reserve drugs, otherwise the ambitious goal  
10  
11 322 of the Government of India to eliminate tuberculosis by 2025 seems bleak.  
12  
13  
14

15 323 **Acknowledgements** The authors thank Mr. DK Singh, Mr DC Chamoli, Mrs Jyoti Umrao,  
16  
17 324 Mr Santosh and Mrs Sadhana for providing technical and logistic support.  
18  
19 325

20 326 **Contributors** RM conceptualized the manuscript, designed the methods, supervised the  
21  
22 327 study and wrote the manuscript. VK curated the data. AN supervised the study and edited the  
23  
24 328 manuscript. All authors have reviewed the final version of the manuscript.  
25  
26 329

27 330 **Funding** The authors have not declared a specific grant for this research from any funding  
28  
29 331 agency in the public, commercial or not – for- profit sectors.  
30  
31 332

32 333 **Competing interests** None declared.  
33  
34 334

35 335 **Patient consent for publication** Not required.  
36  
37 336

38 337 **Ethics approval** The study protocol was approved by the Institutional Ethics Committee of  
39  
40 338 Sanjay Gandhi Post Graduate Institute of Medical Sciences SGPGIMS: (IEC 2017-37-IMP-  
41  
42 339 EXP). Written informed consent was obtained from each participant.  
43  
44 340

45 341 **Data availability statement** Data are available upon reasonable request.  
46  
47 342  
48 343  
49 344  
50 345  
51 346  
52 347  
53 348  
54  
55  
56  
57  
58  
59  
60

349 **References**

- 350 1. World Health Organisation. Global tuberculosis report 2020.  
351 [https://www.who.int/tb/publications/global\\_report](https://www.who.int/tb/publications/global_report)
- 352 2. Law S, Piatek A, Vincent C, et al. Emergence of drug resistance in patients with  
353 tuberculosis cared for by the Indian health-care system: a dynamic modelling  
354 study *Lancet Public Health* 2017;2: e47–55.
- 355 3. Chatterjee S, Poonawala H, Jain Y. Drug resistant tuberculosis: is India ready for the challenge  
356 ? *BMJ Glob Health* 2018;3:e000971
- 357 4. Programmatic Management of Drug Resistance, 2017, Guidelines on programmatic  
358 management of drug resistant tuberculosis in India 2017: Central TB Division  
359 Directorate General of Health Services, Government of India; 2018 (cited 2019 Jun 24)
- 360 5. Mirzayev F, Viney K, Nhat Linh N, et al. World Health Organization recommendations  
361 on the treatment of drug-resistant tuberculosis, 2020 update. *Eur Respir J* 2020; in press  
362 (<https://doi.org/10.1183/13993003.03300-2020>).
- 363 6. Deun V, Maug AK, Salim MA, et al. Short, highly effective, and inexpensive  
364 standardized treatment of multidrug-resistant tuberculosis. *Am J Respir Crit Care*  
365 *Med.* 2010 ;182:684-92. doi: 10.1164/rccm.201001-0077OC
- 366 7. Definitions and reporting framework for tuberculosis 2013 revision (updated Dec  
367 2014 & Jan 2020), WHO ([www.who.int](http://www.who.int))
- 368 8. Ministry of Health and Family Welfare GoI. *Report of the first national anti-*  
369 *tuberculosis drug resistance survey, 2014-16*, 2018.
- 370 9. Amitapitre. *A Rapid Gender Assessment of Tuberculosis in India*. 2018.
- 371 10. Udawadia Z, Mullerpattan J, Shah K, et al. Possible impact of the standardized  
372 Category IV regimen on multidrug-resistant tuberculosis patients in  
373 Mumbai. *Lung India*. 2016; 33: 253–56.

- 1  
2  
3 374 11. Shivekar, S.S., Kaliaperumal, V., Brammacharry, U. *et al.* Prevalence and factors  
4  
5 375 associated with multidrug-resistant tuberculosis in South  
6  
7 376 India. *SciRep* 2020;10: 17552. <https://doi.org/10.1038/s41598-020-74432-y>  
8  
9  
10 377 12. Goyal V, Kadam V, Narang P, et al. Prevalence of drug-resistant pulmonary  
11  
12 378 tuberculosis in India: systematic review and meta-analysis. *BMC Public Health*.2017;  
13  
14 379 17:817  
15  
16  
17 380 13. Marlowe E, Novak-Weekley S, Cumpio J, Sharp S, Momeny M, Babst A et al  
18  
19 381 Evaluation of the Cepheid Xpert MTB/RIF assay for direct detection of  
20  
21 382 Mycobacterium tuberculosis complex in respiratory specimens. *J. Clin. Microbiol.*  
22  
23 383 2011; 49:1621–1623  
24  
25  
26 384 14. Zeka A, Tasbakan S, Cavusoglu C. Evaluation of the GeneXpert MTB/RIF Assay for  
27  
28 385 Rapid Diagnosis of Tuberculosis and Detection of Rifampin Resistance in Pulmonary  
29  
30 386 and Extrapulmonary Specimens. *J Clin Microbiol*.2011;49:4138–41  
31  
32  
33 387 15. Sethi S, Agarwal P, Khaneja R, et al. Second-line Drug Resistance Characterization in  
34  
35 388 Mycobacterium tuberculosis by Genotype MTBDRsl Assay. *Journal of Epidemiology*  
36  
37 389 *and Global Health*. 2020;10: 42-45  
38  
39  
40 390 16. Dalal A, Pawaskar A, Das M, et al.) Resistance Patterns among Multidrug-Resistant  
41  
42 391 Tuberculosis Patients in Greater Metropolitan Mumbai: Trends over Time. *PLoS*  
43  
44 392 *ONE*.2015;10: e0116798. <https://doi.org/10.1371/journal.pone.0116798>  
45  
46  
47 393 17. Ho J, Jelfs P, Sintchenko V. Fluoroquinolone resistance in non-multidrug-resistant  
48  
49 394 tuberculosis— a surveillance study in New South Wales, Australia, and a review of  
50  
51 395 global resistance rates. *Int J Infect Dis*2014;26: 149–153  
52  
53  
54 396 18. Chee CBE, KhinMar K-W, Sng L-H, et al. The shorter multidrug-resistant tuberculosis  
55  
56 397 treatment regimen in Singapore: are patients from South-East Asia eligible?  
57  
58 398 *Eur Respir J* 2017; 50:170075  
59  
60



- 1  
2  
3 399 19. Singh PK, Jain A. Limited scope of shorter drug regimen for MDR TB caused by  
4  
5 400 high resistance to fluoroquinolone. *EmergInfectDis*.2019;25:1760-62.  
6  
7 401 20. McDowell A, Pai M. Treatment as diagnosis and diagnosis as treatment: empirical  
8  
9 402 management of presumptive tuberculosis in India *.Int J tubercLung Dis*.  
10  
11 403 2016;20:536–543.  
12  
13 404  
14  
15 405  
16  
17 406  
18  
19 407  
20  
21 408  
22  
23 409  
24  
25 410  
26  
27 411  
28  
29 412  
30  
31 413  
32  
33 414  
34  
35 415  
36  
37 416  
38  
39 417  
40  
41 418  
42  
43 419  
44  
45 420  
46  
47 421  
48  
49 422  
50  
51 423  
52  
53  
54  
55  
56  
57  
58  
59  
60



1  
2  
3 **424 Table 1.** Smear and culture results among samples positive by Xpert MTB /RIF assay

4  
5 **425** (n=1032)

6  
7  
8 **426**

| Sample (N=1032)<br>(%)     | Smear positive | Culture positive (%) |
|----------------------------|----------------|----------------------|
| Pulmonary(n=706)           | 382(54.1%)     | 384(54.3%)           |
| Extra-<br>pulmonary(n=326) | 125(38.3%)     | 133(40.7%)           |
| Total                      | 507(49.1%)     | 517(50%)             |

9  
10  
11  
12  
13  
14  
15  
16  
17  
18  
19  
20  
21  
22  
23  
24 **427**

25  
26 **428**

27  
28  
29 **429**

30  
31 **430**

32  
33 **431**

34  
35 **432**

36  
37  
38 **433**

39  
40 **434**

41  
42 **435**

43  
44 **436**

45  
46  
47 **437**

48  
49 **438**

50  
51 **439**

52  
53 **440**

54  
55 **441**

56  
57  
58 **442**

1  
2  
3 **443 Table 2:** Comparison of Gene Xpert MTB / RIF positive, MTB culture positive results with  
4  
5  
6 **444** smear results

7  
8 **445**

9  
10 **446**

|          | SmearMTB culture +<br>Gene Xpert+ | MTB culture +<br>Gene Xpert- | MTB culture-<br>Gene Xpert+ | MTB culture-<br>Gene Xpert- | Total |
|----------|-----------------------------------|------------------------------|-----------------------------|-----------------------------|-------|
| Positive | 336                               | 0                            | 171                         | 0                           | 507   |
| Negative | 112                               | 69                           | 413                         | 1944                        | 2538  |
| Total    | 448                               | 69                           | 584                         | 1944                        | 3045  |

26 **447**

28  
29 **448**

30  
31 **449**

32  
33 **450**

34  
35 **451**

36  
37 **452**

38  
39 **453**

40  
41 **454**

42  
43 **455**

44  
45 **456**

46  
47 **457**

48  
49 **458**

50  
51 **459**

52  
53 **460**

54  
55 **461**

1  
2  
3 **462 Figure legends**  
4

5 463  
6

7  
8 **464 Figure 1.** Age distribution of cases positive by Xpert MTB/ RIF assay (n=1032)  
9

10 465  
11

12 **466 Figure 2.** Distribution of samples positive by the Xpert MTB/RIF assay (n=1032)  
13

14 467  
15

16  
17 **468 Figure 3.** Results of conventional and molecular diagnostic testing by Xpert MTB/ RIF assay  
18  
19 469 of samples included in the study (n=3045)  
20

21 470  
22

23  
24 **471 Figure 4.** Distribution of samples among rifampicin resistant cases (n=223)  
25

26 472  
27

28 **473 Figure 5:** Results for second line susceptibility testing performed by line probe assay (LPA)  
29

30  
31 474 version2  
32

33 475  
34  
35  
36  
37  
38  
39  
40  
41  
42  
43  
44  
45  
46  
47  
48  
49  
50  
51  
52  
53  
54  
55  
56  
57  
58  
59  
60

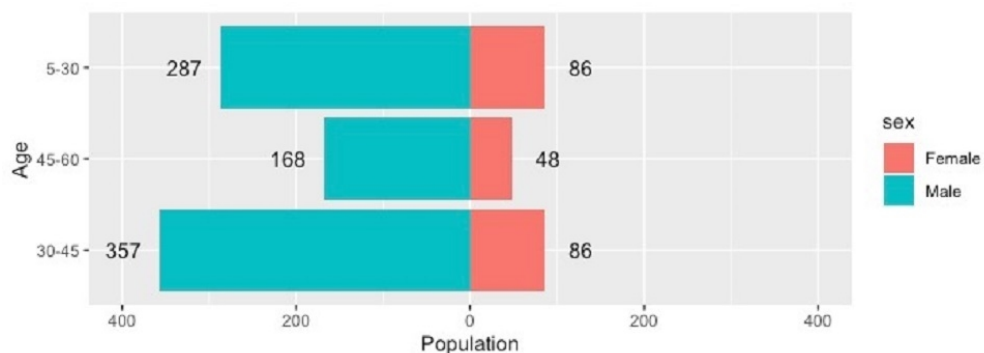

81x29mm (300 x 300 DPI)

1  
2  
3  
4  
5  
6  
7  
8  
9  
10  
11  
12  
13  
14  
15  
16  
17  
18  
19  
20  
21  
22  
23  
24  
25  
26  
27  
28  
29  
30  
31  
32  
33  
34  
35  
36  
37  
38  
39  
40  
41  
42  
43  
44  
45  
46  
47  
48  
49  
50  
51  
52  
53  
54  
55  
56  
57  
58  
59  
60

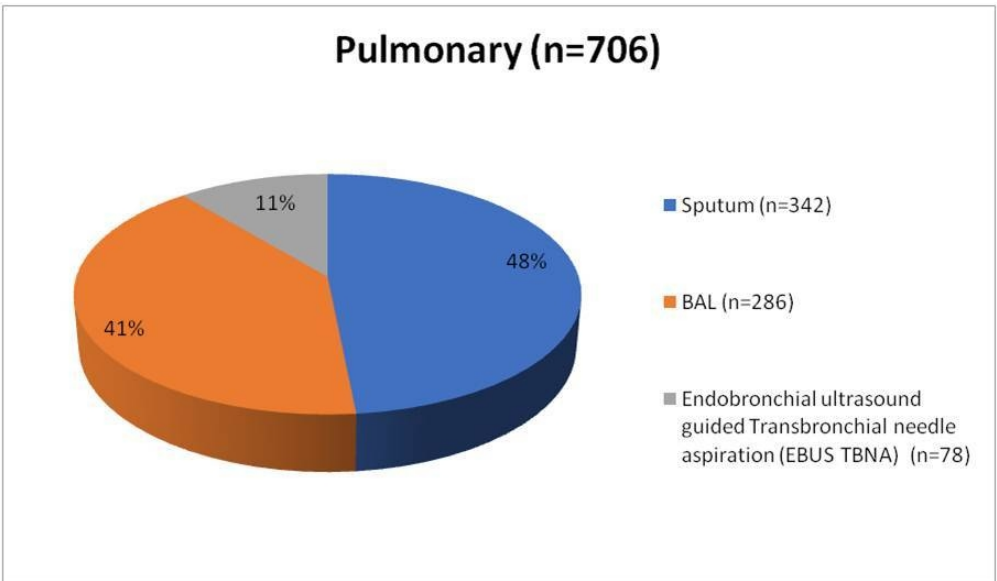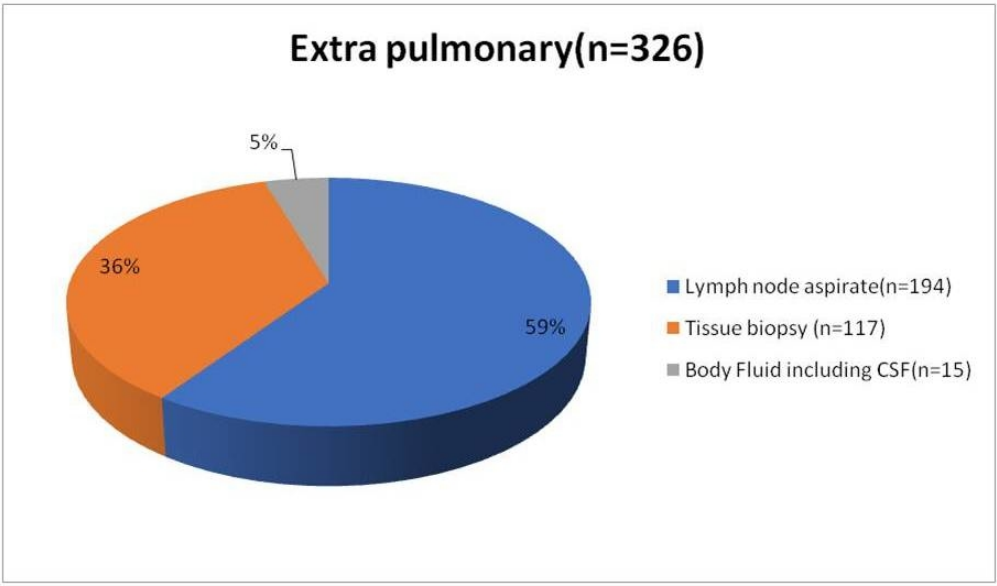

76x90mm (300 x 300 DPI)

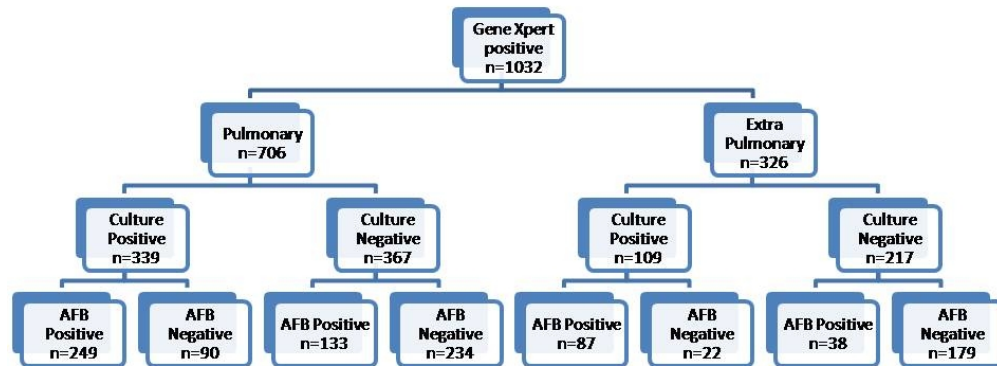

80x66mm (300 x 300 DPI)

1  
2  
3  
4  
5  
6  
7  
8  
9  
10  
11  
12  
13  
14  
15  
16  
17  
18  
19  
20  
21  
22  
23  
24  
25  
26  
27  
28  
29  
30  
31  
32  
33  
34  
35  
36  
37  
38  
39  
40  
41  
42  
43  
44  
45  
46  
47  
48  
49  
50  
51  
52  
53  
54  
55  
56  
57  
58  
59  
60

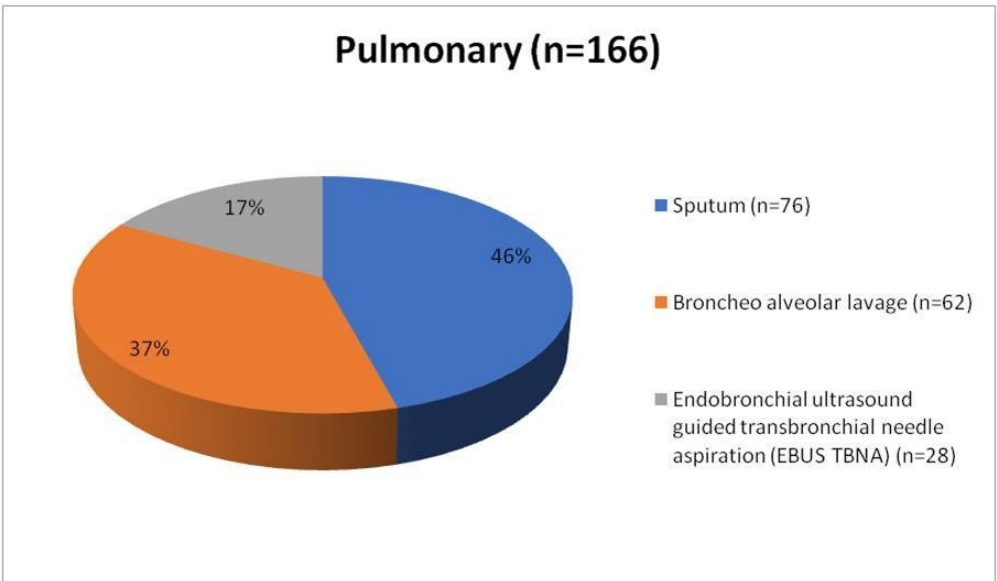

### Extra pulmonary (n=57)

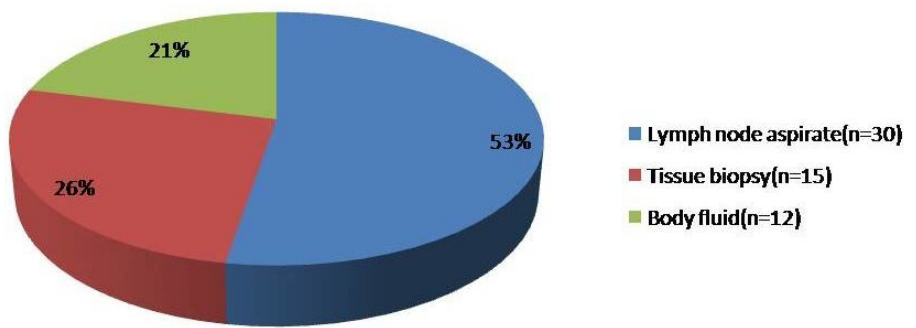

76x89mm (300 x 300 DPI)

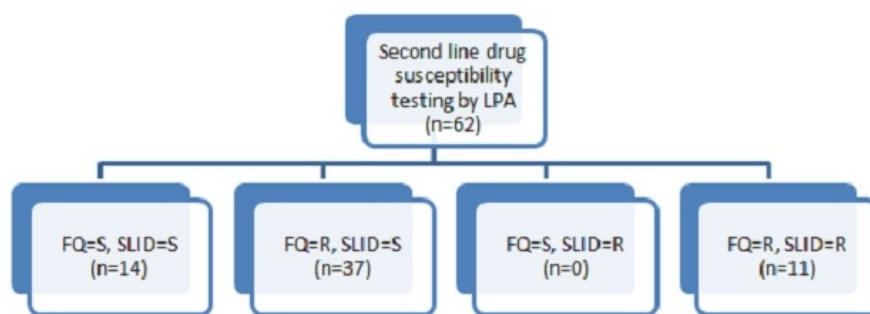

**S = Sensitive; R = Resistant; FQ = Floroquinolones;  
SLID = Second line injectable drugs**

59x29mm (300 x 300 DPI)



**STROBE 2007 (v4) Statement—Checklist of items that should be included in reports of *cohort studies***

| Section/Topic                | Item # | Recommendation                                                                                                                                                                       | Reported on page #/Line no. |
|------------------------------|--------|--------------------------------------------------------------------------------------------------------------------------------------------------------------------------------------|-----------------------------|
| <b>Title and abstract</b>    | 1      | (a) Indicate the study's design with a commonly used term in the title or the abstract                                                                                               | #1/2-3                      |
|                              |        | (b) Provide in the abstract an informative and balanced summary of what was done and what was found                                                                                  | #2/23-38                    |
| <b>Introduction</b>          |        |                                                                                                                                                                                      |                             |
| Background/rationale         | 2      | Explain the scientific background and rationale for the investigation being reported                                                                                                 | #4/72-87                    |
| Objectives                   | 3      | State specific objectives, including any prespecified hypotheses                                                                                                                     | #4/88-90                    |
| <b>Methods</b>               |        |                                                                                                                                                                                      |                             |
| Study design                 | 4      | Present key elements of study design early in the paper                                                                                                                              | #4/93-96                    |
| Setting                      | 5      | Describe the setting, locations, and relevant dates, including periods of recruitment, exposure, follow-up, and data collection                                                      | #4/93-97<br>#6/124-125      |
| Participants                 | 6      | (a) Give the eligibility criteria, and the sources and methods of selection of participants. Describe methods of follow-up                                                           | #6/128-142                  |
|                              |        | (b) For matched studies, give matching criteria and number of exposed and unexposed                                                                                                  | NA                          |
| Variables                    | 7      | Clearly define all outcomes, exposures, predictors, potential confounders, and effect modifiers. Give diagnostic criteria, if applicable                                             | #7/166-181                  |
| Data sources/<br>measurement | 8*     | For each variable of interest, give sources of data and details of methods of assessment (measurement). Describe comparability of assessment methods if there is more than one group | NA                          |
| Bias                         | 9      | Describe any efforts to address potential sources of bias                                                                                                                            | #9/203-205                  |
| Study size                   | 10     | Explain how the study size was arrived at                                                                                                                                            | #5/100-104                  |
| Quantitative variables       | 11     | Explain how quantitative variables were handled in the analyses. If applicable, describe which groupings were chosen and why                                                         | NA                          |
| Statistical methods          | 12     | (a) Describe all statistical methods, including those used to control for confounding                                                                                                | #8/168-175                  |
|                              |        | (b) Describe any methods used to examine subgroups and interactions                                                                                                                  | #7/152-153                  |
|                              |        | (c) Explain how missing data were addressed                                                                                                                                          | #6/120-122                  |
|                              |        | (d) If applicable, explain how loss to follow-up was addressed                                                                                                                       | NA                          |
|                              |        | (e) Describe any sensitivity analyses                                                                                                                                                | #8/168-175                  |
| <b>Results</b>               |        |                                                                                                                                                                                      |                             |

|                          |     |                                                                                                                                                                                                              |                            |
|--------------------------|-----|--------------------------------------------------------------------------------------------------------------------------------------------------------------------------------------------------------------|----------------------------|
| Participants             | 13* | (a) Report numbers of individuals at each stage of study—eg numbers potentially eligible, examined for eligibility, confirmed eligible, included in the study, completing follow-up, and analysed            | #6/126-142                 |
|                          |     | (b) Give reasons for non-participation at each stage                                                                                                                                                         | NA                         |
|                          |     | (c) Consider use of a flow diagram                                                                                                                                                                           | #7/159-161<br>#8/177-178   |
| Descriptive data         | 14* | (a) Give characteristics of study participants (eg demographic, clinical, social) and information on exposures and potential confounders                                                                     | #7/152-154                 |
|                          |     | (b) Indicate number of participants with missing data for each variable of interest                                                                                                                          | #6/1120-122<br>#13/307-310 |
|                          |     | (c) Summarise follow-up time (eg, average and total amount)                                                                                                                                                  | NA                         |
| Outcome data             | 15* | Report numbers of outcome events or summary measures over time                                                                                                                                               | NA                         |
| Main results             | 16  | (a) Give unadjusted estimates and, if applicable, confounder-adjusted estimates and their precision (eg, 95% confidence interval). Make clear which confounders were adjusted for and why they were included | NA                         |
|                          |     | (b) Report category boundaries when continuous variables were categorized                                                                                                                                    | #7/152-154                 |
|                          |     | (c) If relevant, consider translating estimates of relative risk into absolute risk for a meaningful time period                                                                                             | NA                         |
| Other analyses           | 17  | Report other analyses done—eg analyses of subgroups and interactions, and sensitivity analyses                                                                                                               | #7/168-172                 |
| <b>Discussion</b>        |     |                                                                                                                                                                                                              |                            |
| Key results              | 18  | Summarise key results with reference to study objectives                                                                                                                                                     | #13/314-321                |
| <b>Limitations</b>       |     |                                                                                                                                                                                                              |                            |
| Interpretation           | 20  | Give a cautious overall interpretation of results considering objectives, limitations, multiplicity of analyses, results from similar studies, and other relevant evidence                                   | #11/251-258<br>#13/304-312 |
| Generalisability         | 21  | Discuss the generalisability (external validity) of the study results                                                                                                                                        | #13/317-321                |
| <b>Other information</b> |     |                                                                                                                                                                                                              |                            |
| Funding                  | 22  | Give the source of funding and the role of the funders for the present study and, if applicable, for the original study on which the present article is based                                                | #13/307-312                |

\*Give information separately for cases and controls in case-control studies and, if applicable, for exposed and unexposed groups in cohort and cross-sectional studies.

**Note:** An Explanation and Elaboration article discusses each checklist item and gives methodological background and published examples of transparent reporting. The STROBE checklist is best used in conjunction with this article (freely available on the Web sites of PLoS Medicine at <http://www.plosmedicine.org/>, Annals of Internal Medicine at <http://www.annals.org/>, and Epidemiology at <http://www.epidem.com/>). Information on the STROBE Initiative is available at [www.strobe-statement.org](http://www.strobe-statement.org).

# BMJ Open

## Assessment of burden of drug –resistant tuberculosis at a tertiary care centre in northern India: a prospective single centre cohort study

|                                 |                                                                                                                         |
|---------------------------------|-------------------------------------------------------------------------------------------------------------------------|
| Journal:                        | <i>BMJ Open</i>                                                                                                         |
| Manuscript ID                   | bmjopen-2020-044096.R2                                                                                                  |
| Article Type:                   | Original research                                                                                                       |
| Date Submitted by the Author:   | 26-Mar-2021                                                                                                             |
| Complete List of Authors:       | Misra, Richa; SGPGIMS<br>Kesarwani, Vasudha ; SGPGIMS<br>Nath, Alok; SGPGIMS,                                           |
| <b>Primary Subject Heading</b>: | Epidemiology                                                                                                            |
| Secondary Subject Heading:      | Public health                                                                                                           |
| Keywords:                       | Tuberculosis < INFECTIOUS DISEASES, Epidemiology < TROPICAL MEDICINE, MICROBIOLOGY, Public health < INFECTIOUS DISEASES |
|                                 |                                                                                                                         |

SCHOLARONE™  
Manuscripts



I, the Submitting Author has the right to grant and does grant on behalf of all authors of the Work (as defined in the below author licence), an exclusive licence and/or a non-exclusive licence for contributions from authors who are: i) UK Crown employees; ii) where BMJ has agreed a CC-BY licence shall apply, and/or iii) in accordance with the terms applicable for US Federal Government officers or employees acting as part of their official duties; on a worldwide, perpetual, irrevocable, royalty-free basis to BMJ Publishing Group Ltd ("BMJ") its licensees and where the relevant Journal is co-owned by BMJ to the co-owners of the Journal, to publish the Work in this journal and any other BMJ products and to exploit all rights, as set out in our [licence](#).

The Submitting Author accepts and understands that any supply made under these terms is made by BMJ to the Submitting Author unless you are acting as an employee on behalf of your employer or a postgraduate student of an affiliated institution which is paying any applicable article publishing charge ("APC") for Open Access articles. Where the Submitting Author wishes to make the Work available on an Open Access basis (and intends to pay the relevant APC), the terms of reuse of such Open Access shall be governed by a Creative Commons licence – details of these licences and which [Creative Commons](#) licence will apply to this Work are set out in our licence referred to above.

Other than as permitted in any relevant BMJ Author's Self Archiving Policies, I confirm this Work has not been accepted for publication elsewhere, is not being considered for publication elsewhere and does not duplicate material already published. I confirm all authors consent to publication of this Work and authorise the granting of this licence.

1  
2  
3 **TITLE PAGE**  
4

5  
6 **Title:** Assessment of burden of drug –resistant tuberculosis at a tertiary care centre in  
7  
8 northern India: a prospective single centre cohort study  
9

10  
11 **Authors and affiliations:** RichaMisra<sup>a</sup>, VasudhaKesarwani<sup>a</sup>, Alok Nath<sup>\*b</sup>  
12

13  
14 <sup>a</sup>MD, Department of Microbiology, Division Mycobacteriology, Sanjay Gandhi Post-  
15  
16 graduate Institute of Medical Sciences,Lucknow-226014,India  
17

18  
19 <sup>b</sup>MD, DM, Department of Pulmonary Medicine, Sanjay Gandhi Post-graduate Institute of  
20  
21 Medical Sciences,Lucknow-226014,India  
22

23  
24  
25 **\*Corresponding author:** Dr. Alok Nath, Professor, Department of Pulmonary Medicine,  
26  
27 Sanjay Gandhi Post-graduate Institute of Medical Sciences, Lucknow-226014, India.  
28

29  
30  
31 **Corresponding author E mail:**  
32

33  
34 [draloksgpgi@gmail.com](mailto:draloksgpgi@gmail.com)  
35

36  
37 Phone: +919839070065  
38

39  
40 Word count text: 3133  
41  
42

43  
44  
45  
46  
47  
48  
49  
50  
51  
52  
53  
54  
55  
56  
57  
58  
59  
60

## 22 Abstract

23 **Objectives:** We aim to define the burden of rifampicin monoresistant tuberculosis at a  
24 tertiary care centre in Northern India as well as determine the second line drug susceptibilities  
25 in a subset of patients.

26 **Methods:** A total of 3045 pulmonary (n=1883) and extra-pulmonary (n=1162) samples from  
27 likely tuberculosis patients were subjected to microscopy, culture and the Xpert MTB/RIF  
28 assay from March 2017 to June 2019. Second line drug susceptibility testing by version 2 Line  
29 Probe Assay for fluoroquinolones (FQs) and second line injectable drugs (SLIDs) was  
30 performed on 62 samples.

31 **Results:** Out of 3045 samples processed in our lab during the study period, 36.1%  
32 (1101/3045) were positive for MTBC and 21.6% were rifampicin mono-resistant (223/1032).  
33 The rate of rifampicin resistance in pulmonary samples was 23.5% (166/706) and in  
34 extrapulmonary cases it was 17.4% (57/326). Out of 62 cases included for second line testing,  
35 48 were resistant to FQs (77.4%) while 11 were extensively drug resistant (XDR).

36 **Conclusions:** India urgently needs to arrest an emerging multidrug-resistant tuberculosis  
37 epidemic with associated resistance to fluoroquinolones. A robust surveillance system is  
38 needed to execute the National strategic Plan (NSP) for 2017-2025.

39  
40 **Keywords:** Tuberculosis; Multi-drug resistant; Xpert MTB/RIF assay; Line Probe Assay

1  
2  
3 47  
4  
5 48  
6 **Article summary section**  
7  
8 49  
9  
10 50  
11  
12 51  
13  
14 52  
15  
16 53  
17  
18 54  
19  
20 55  
21  
22 56  
23  
24 57  
25  
26 58  
27  
28 59  
29  
30 60  
31  
32 61  
33  
34 62  
35  
36 63  
37  
38 64  
39  
40 65  
41  
42 66  
43  
44 67  
45  
46 68  
47  
48 69  
49  
50 70  
51  
52  
53  
54  
55  
56  
57  
58  
59  
60

### **Strengths and limitations of this study**

- Study has a large sample size of 3045 samples.
- 1162 extrapulmonary samples have been included such as EBUS-TBNA and biopsies
- Both Xpert MTB/RIF assay and Line probe assay have been performed
- MGIT-DST was not performed
- DNA sequencing was not done on drug-resistant isolates

## 71 INTRODUCTION

72 India has the highest Tuberculosis (TB) burden in the world and is home to 26% of the  
73 world's estimated 10.4 million annual tuberculosis cases.<sup>1</sup> The menace of drug resistant-TB  
74 (DR-TB), prompted the government to initiate the programmatic management of drug  
75 resistant TB (PMDT) in 2007 which integrates all programme based strategies for DR-TB  
76 diagnosis, management and treatment under the NTEP, National Tuberculosis Elimination  
77 Programme (renamed in December 2019)<sup>2</sup>. India also has a complex as well as unorganized  
78 health-care system which includes the government sector, private sector and informal health  
79 care providers practicing non-allopathic schools of medicine such as ayurveda and  
80 homeopathy<sup>3</sup>. Though TB was made a notifiable disease in 2012, less than 40% cases from  
81 the private sector were notified to the government in 2017<sup>4</sup>.

82 The shorter drug regimen of 9-12 months for MDR-TB patients was introduced by World  
83 Health Organization (WHO), in May 2016 and updated in June 2020.<sup>5,6</sup>It was recommended  
84 in patients who have not been previously treated with second-line drugs and in whom  
85 resistance to fluoroquinolones and second-line injectable agents has been excluded. However,  
86 drug susceptibility testing in India is technically challenging and requires specialist  
87 laboratory facilities and personnel .The TB laboratory network has been expanded over the  
88 years to provide better access to quality assured diagnostic services. Laboratory services are  
89 now being provided free of cost to patients attending public health facilities as well as those  
90 referred from the private sector.<sup>7</sup>

91 With this background, we aim to define the burden of rifampicin mono-resistant tuberculosis  
92 at a tertiary care referral medical center in northern India as well as determine the second line  
93 drug susceptibilities in a subset of patients.



## 94 **METHODS**

### 95 **Study design and setting**

96 This prospective observational study between March 2017 to June 2019 was conducted in the  
97 Mycobacteriology section of the Department of Microbiology at Sanjay Gandhi Postgraduate  
98 Institute of Medical Sciences, a 1200 bed tertiary care referral medical center in northern  
99 India. Institutional ethics committee of Sanjay Gandhi Postgraduate Institute of Medical  
100 Sciences (SGPGIMS) approved the study protocol (IEC code 2017-37-IMP-EXP) and waiver  
101 of consent was obtained.

### 102 **Clinical specimens**

103 Three thousand forty five pulmonary and extrapulmonary samples (930 sputum, 752  
104 bronchoalveolar lavage, 146 EBUS-TBNA (endobronchial ultrasound with real-time guided  
105 transbronchial needle aspiration), 54 bronchial/tracheal aspirate, 429 lymph node aspirates/  
106 Fine Needle Aspiration Cytology(FNAC), 367 biopsies, 338 pus and 29 CSF were collected  
107 between March 2017 and June 2019 during the clinical routine. All samples were divided into  
108 2 portions on receipt in the laboratory. One aliquot was used to perform the Xpert MTB/RIF  
109 assay while microscopy and culture was performed from the remaining sample. Direct smears  
110 were prepared from the specimens using Ziehl-Neelsen staining. All non-sterile clinical  
111 samples were processed using the *N*-acetyl-L-cysteine-sodium citrate-NaOH (NALC-NaOH)  
112 method. Samples were decanted following centrifugation, and sediments were re-suspended  
113 in 3 ml of phosphate buffer solution. Processed samples were used to inoculate either  
114 Lowenstein-Jensen (LJ) solid medium or BacT/Alert culture. Line probe assay *version2*  
115 (LPA<sub>v2</sub>) for second line testing was performed on either direct clinical samples if volume  
116 was adequate or on positive culture. Both Xpert MTB/RIF assay and LPA<sub>v2</sub> were performed  
117 according to the manufacturer's protocol.

118 All cases detected positive by the Xpert MTB/RIF assay were grouped into (i) those with

1  
2  
3 119 smear-positive and culture positive tuberculosis; (ii) those with smear-negative, culture-  
4  
5 120 positive tuberculosis; (iii) those who were both smear and culture negative for tuberculosis  
6  
7  
8 121 but who were nonetheless treated for tuberculosis on the basis of clinical, pathological, and/or  
9  
10 122 radiological findings (clinical tuberculosis).

11  
12  
13 123 There was a sub group of samples that were culture positive but missed by the Xpert  
14  
15 124 MTB/RIF assay. We put up the TB Ag MPT64 Rapid test (SD BIOLINE) on all these  
16  
17  
18 125 positive cultures.

## 19 20 21 126 **Data collection**

22  
23 127 The medical records of patients were retrieved from the Hospital Information System. A  
24  
25 128 senior resident extracted patient data prospectively from charts.

## 26 27 28 129 **Classifications and definitions including RR-TB/MDR-TB/XDR-TB(rifampicin** 29 30 130 **resistant/multi-drug resistant/extensively drug resistant)<sup>8</sup>**

31  
32  
33 131 *Abacteriologically confirmed TB case:* One from whom a biological specimen was positive  
34  
35 132 by smear microscopy, culture or WRD (WHO approved rapid diagnostic test) such as Xpert  
36  
37  
38 133 MTB/RIF assay.

39  
40  
41 134 *Pulmonary tuberculosis (PTB):* Any bacteriologically confirmed or clinically diagnosed case  
42  
43 135 of TB involving lung parenchyma or tracheobronchial tree.

44  
45  
46 136 *Extrapulmonary tuberculosis (EPTB):* Any bacteriologically confirmed or clinically  
47  
48 137 diagnosed case of TB involving organs other than the lungs, e.g. pleura, lymph nodes,  
49  
50 138 abdomen, genitourinary tract, skin, joints and bones, meninges. Concomitant pulmonary  
51  
52 139 lesions were ruled out in all cases by appropriate investigations and review of case files.

53  
54  
55  
56 140 *Multidrug resistance TB (MDR):* A TB patient, whose biological specimen is resistant to both  
57  
58 141 H and R with or without resistance to other first-line anti-TB drugs.

1  
2  
3 142 *Pre-XDR-TB*: It is defined as TB with resistance to isoniazid and rifampicin and either a FQ  
4  
5 143 or a second-line injectable agent but not both.

6  
7 144 *Extensive drug resistance (XDR)*: A MDR-TB patient whose biological specimen  
8  
9 145 is additionally resistant to at least a FQ and a SLI anti-TB drug.

## 12 146 **Patient and public involvement**

13  
14  
15 147 Patients were involved in the reporting of our research in this study.

## 17 148 **RESULTS**

18  
19 149 During the 27 month study period, 1883 pulmonary and 1162 extra-pulmonary specimens  
20  
21 150 (n=3045) were subjected to the GeneXpert MTB/RIF assay in our laboratory along with  
22  
23 151 concomitant smear and culture inoculation on the same sample. All duplicate isolates were  
24  
25 152 excluded. One thousand thirty two (33.8%) samples (706 pulmonary, 326 extra-pulmonary)  
26  
27 153 were detected for MTB complex. The assay failed to detect sixty nine samples that were  
28  
29 154 culture positive. The MPT64 antigen test was positive on all these cultures. There were 806  
30  
31 155 (78.10%) males and 226 (21.89%) females among the positive specimens. The median age of  
32  
33 156 patients was 32 years and nearly 43% patients were young adults in the age group of 30-45  
34  
35 157 years as shown in Figure 1. Lymph node aspirates/FNAC and tissue biopsy (including colonic  
36  
37 158 biopsy) were the most common samples in extra-pulmonary cases that were positive. The  
38  
39 159 sample distribution of positive specimens is shown in Figure 2. Out of 1032 samples detected  
40  
41 160 positive by the CBNAAT assay, 507 and 517 specimens were smear and culture positive  
42  
43 161 respectively. The rate of smear and culture positivity in pulmonary and extra-pulmonary  
44  
45 162 cases was 54.1%, 54.3%, 38.3% and 40.7% respectively (Table-1). The results of  
46  
47 163 conventional and molecular diagnostic testing by Xpert MTB/RIF assay of patients included  
48  
49 164 in the study is shown in Figure 3.

50  
51 165 During the study period, we also recovered 34 isolates of Non-tuberculous Mycobacteria  
52  
53 166 (NTM) from various pus and respiratory specimens. These were *Mycobacterium abscessus*  
54  
55  
56  
57  
58  
59  
60

167 (n=15), *Mycobacterium intracellulare*(7), *Mycobacterium fortuitum* (6), *Mycobacterium*  
168 *gordoniae*(n=3) and *Mycobacterium simiae*(n=3).

169 Rifampicin monoresistance was detected in 223 out of 1032 samples (21.6%). It was 23.5%  
170 (n=166/706) and 17.4% (57/326) in pulmonary and extra-pulmonary cases respectively  
171 (Figure 4).A summary of the performance data is shown in Table 2. Five hundred and  
172 seventeen samples were positive by culture resulting in an 86.6% agreement with the Xpert  
173 MTB/RIF assay. The assay had a 100% agreement for culture positive, smear positive  
174 specimens and 61.6% agreement for culture positive, smear negative specimens for the  
175 detection of *Mycobacterium tuberculosis*. Sixty nine samples that were culture positive tested  
176 negative by the Xpert MTB/RIF assay. We did not have any sample that was positive on both  
177 smear and culture but was negative by Xpert MTB/RIF assay. As shown in Table 2, we  
178 detected 413 more patients than we could have diagnosed by smear and/or culture alone.

179 Out of 223 rifampicin resistant cases, we could put up second line drug susceptibility testing  
180 by LPA v2.0 for 62 cases (n=40, pulmonary and n=22, extra-pulmonary). As shown in Figure  
181 5, majority of our patients (77.4%) were resistant to FLQs (n=48/62). Only 14 patients were  
182 sensitive to both FLQ and SLID. Thirty seven cases were resistant to FQs only (Pre-XDR)  
183 while 11 were resistant to both classes of drugs (XDR). We did not recover any isolate that  
184 was aminoglycoside resistant but FLQ sensitive.

## 185 Discussion

186 Multidrug-resistant tuberculosis is one of the greatest public health challenges worldwide. To  
187 the best of our knowledge, ours is the first study from India to determine the burden of drug  
188 resistant tuberculosis by testing such a large number of pulmonary and extra-pulmonary  
189 clinical samples. As per Global TB Report 2020, eight countries accounted for two thirds of  
190 the global total: India (26%), Indonesia (8.5%), China (8.4%), the Philippines (6.0%),  
191 Pakistan (5.7%), Nigeria (4.4%), Bangladesh (3.6%) and South Africa (3.6%).<sup>1</sup>

1  
2  
3 192 The results of the national anti-tuberculosis drug resistance survey has shown that the  
4  
5 193 incidence of TB is highest in the 25–34 year age group in India<sup>9</sup>. We however documented a  
6  
7 194 slightly higher age group in our study. Our cohort was dominated by males and nearly 43%  
8  
9 195 patients were young adults in the age group of 30-45 years. The high frequency of the disease  
10  
11 196 among the younger population may facilitate the transmission of TB in the community due to  
12  
13 197 greater mobility of youth. A gender analysis of the TB epidemic shows that TB affects  
14  
15 198 different genders differently. In 2016, about 40% of the 2.79 million new cases of TB in India  
16  
17 199 were among women and the male to female ratio for TB stood between 1.07 to 2.25 with  
18  
19 200 women accounting for 40% of new cases. In our study, it was 3.5. Studies have shown that  
20  
21 201 women may be diagnosed late or not diagnosed at all due to socio-cultural barriers such as  
22  
23 202 high burden of household work, illiteracy, restricted mobility as well as lack of autonomy.  
24  
25 203 There is also a high level of stigma associated with the disease among unmarried females<sup>10</sup>.  
26  
27 204 WHO's current policies and guidance recommend that the Xpert MTB/RIF assay may be  
28  
29 205 used as an initial diagnostic test in individuals likely of having MDR-TB. About 36% of the  
30  
31 206 samples included in our study were positive for *Mycobacterium tuberculosis* complex and the  
32  
33 207 overall rate of resistance to rifampicin was 21.6%. We assessed the burden of tuberculosis in a  
34  
35 208 large cohort of consecutive patients in our hospital thereby eliminating any selection bias in  
36  
37 209 the study population. We also recovered 34 isolates of Non-tuberculous Mycobacteria (NTM)  
38  
39 210 from various samples and all these isolates were negative by the Xpert MTB/RIF assay.  
40  
41 211 In a study carried out in Mumbai, India's commercial capital and one of the most densely  
42  
43 212 populated and congested cities, Udwardia et al tested 1539 samples at a tertiary care private  
44  
45 213 hospital and reported MDR-TB in 30.14% of cases<sup>11</sup>. In another retrospective study from  
46  
47 214 South India, Shivekar et al performed the MTBDRplus assay on 20245 specimens obtained  
48  
49 215 from presumptive MDR-TB cases during a 6-year study period from 2013 to 2018. Based on  
50  
51 216 the *poB* gene, true resistance, hetero-resistance, and inferred resistance to rifampicin was  
52  
53  
54  
55  
56  
57  
58  
59  
60

1  
2  
3 217 found in 38%, 29.3%, and 32.7% of the 1582 MDR cases, respectively.<sup>12</sup>Goyal et al  
4  
5 218 published a recent systematic review of 75 epidemiological studies for the prevalence of  
6  
7 219 DRTB in India across 2 decades, from 1995 to 2015.Comparative analysis revealed a  
8  
9  
10 220 worsening trend in DR-TB between the two study decades, 37.7% vs 46.1% respectively. The  
11  
12 221 countrywide prevalence of MDR-TB also increased from the earlier decade at 14.9% to  
13  
14 222 27.9% in decade 2.<sup>13</sup>However, the report of the first national anti-tuberculosis drug resistance  
15  
16 223 survey in India conducted during 2014-2016 concluded that among all TB patients tested, the  
17  
18 224 MDR-TB rate was 6.19% with 2.84% among new and 11.60% among previously treated TB  
19  
20 225 patients. The survey has probably under-estimated the true burden of resistance in India since  
21  
22 226 it excluded both smear-negative TB cases as well as extrapulmonary TB and did not include  
23  
24 227 the private sector.<sup>9</sup>

25  
26  
27  
28 228 We also attempted to find the overall agreement of the Xpert MTB/RIF assay compared to  
29  
30 229 culture in our study cohort. In the present study, the sensitivity of the test was nearly 87% and  
31  
32 230 it rose to 100% for smear-positive specimens. The accuracy of the MTB/RIF test to detect the  
33  
34 231 presence of tuberculosis in smear-positive cases has been reported to be between 98% to  
35  
36 232 100%.<sup>14</sup>For smear negative specimens, Zeka et al have reported sensitivities of 68.6% and  
37  
38 233 47.7% in pulmonary and extra-pulmonary samples respectively.<sup>15</sup> Sixty nine specimens that  
39  
40 234 were culture positive tested negative by the Xpert MTB/RIF assay in our study resulting in a  
41  
42 235 specificity of 61.6% (69/112).All these samples were smear negative. We also detected 413  
43  
44 236 cases (40% of 1032 positives) by the Xpert MTB/RIF assay that were missed by both smear  
45  
46 237 as well as culture. The assay achieved higher diagnostic yield than microscopy and increased  
47  
48 238 TB case finding by a factor of about 2.

49  
50  
51 239 The results of second line testing in our study revealed 77.4% resistance to fluoroquinolones  
52  
53 240 among RR isolates which is higher than other studies reported from India. Sethi et al in a  
54  
55 241 retrospective study from a tertiary care center in northern India have documented an overall  
56  
57  
58  
59  
60

1  
2  
3 242 rate of 38.6% FQ resistance among 863 rifampicin-resistant TB isolates.<sup>16</sup> In another study  
4  
5 243 from eight health care facilities in greater Mumbai between 2005 and 2013, Dalal et al  
6  
7 244 investigated the trends over time of patterns of drug resistance in a sample of MDR-TB  
8  
9 245 patients. Between 2005–2007 and 2011–2013, patients with ofloxacin and moxifloxacin  
10  
11 246 resistance significantly increased from 57.6% to 75.3% and from 60.0% to 69.5% ( $p<0.05$ ).<sup>17</sup>  
12  
13 247 A meta-analysis by Ho et al has concluded that globally FQ resistance in MTB is largely  
14  
15 248 confined to MDR strains and knowledge of the global extent of this resistance pattern is  
16  
17 249 currently hampered by the absence of surveillance studies in the majority of regions where  
18  
19 250 TB is endemic.<sup>18</sup>  
20  
21 251 Updated WHO guidelines, published in June 2020, recommend that for patients with MDR-  
22  
23 252 TB and additional fluoroquinolone resistance, a regimen composed of bedaquiline,  
24  
25 253 pretomanid, and linezolid may be used under operational research conditions (6-9 months).<sup>5</sup>  
26  
27 254 Chee et al in a study conducted between 2002-2016 on 280 patients have demonstrated that  
28  
29 255 only about 30% of patients with MDR pulmonary TB diagnosed in their study cohort from  
30  
31 256 South-east Asia were eligible for the WHO shorter MDR-TB treatment regimen.<sup>19</sup>In a similar  
32  
33 257 study from northern India, Singh and Jain have explored the eligibility of the shorter regimen  
34  
35 258 in MDR patients under the programmatic setting. Out of 541 conclusive LPA-SLD results,  
36  
37 259 the proportion of strains resistant to only fluoroquinolones was nearly 50% while 8.3% were  
38  
39 260 resistant to both fluoroquinolones and SLIDs. <sup>20</sup>Eleven cases in our study were extensively  
40  
41 261 drug resistant.  
42  
43 262 The high rates of drug resistance observed in our study may be due to the fact that ours is a  
44  
45 263 tertiary care hospital in the state of Uttar Pradesh which has over 20% of the total number of  
46  
47 264 notified cases of TB in India. We see patients after the referring hospital has already tried and  
48  
49 265 failed to control infection using a combination of different anti-microbial agents. Since  
50  
51 266 facilities for microbiological studies are usually not available in district hospitals/smaller  
52  
53  
54  
55  
56  
57  
58  
59  
60



1  
2  
3 267 cities in India, the first contact physician/surgeon/referral facility are compelled to initiate  
4  
5 268 broad-spectrum antibiotics. Indiscriminate antimicrobial therapy without establishing the  
6  
7 269 etiology of infection selects out the resistant strains. McDowell and Pai in an ethnographic  
8  
9  
10 270 study on the mismanagement of empirical TB treatment in India have demonstrated that all  
11  
12 271 non-specialist private practitioners began antibiotic treatment, especially quinolones, for  
13  
14 272 persistent cough before prescribing a test.<sup>21</sup> Their results underscore the fact that inappropriate  
15  
16 273 prescribing practices in India's burgeoning private sector including easy, over-the-counter  
17  
18 274 access to fluoroquinolones need to be halted as soon as possible.

19  
20  
21 275 The alarming rate of drug resistance in our study to rifampicin as well as fluoroquinolones  
22  
23 276 has important implications for implementation of government strategies to control the TB  
24  
25 277 epidemic in India. Firstly, standardized regimens containing a FQ to treat MDR –TB cases  
26  
27 278 carry a high risk of being sub-optimal and resulting in treatment failure. Secondly, with such  
28  
29 279 high rates of drug resistance India will have to equip itself with enough Mycobacteriology  
30  
31 280 laboratories offering culture and drug susceptibility testing (C-DST) to both first as well as  
32  
33 281 second-line agents. Currently, the focus is to roll out sufficient number of GeneXpert  
34  
35 282 MTB/RIF assay machines to diagnose rifampicin resistant strains of *Mycobacterium*  
36  
37 283 *tuberculosis*. However, this strategy may mask the diagnosis of pre-XDR TB. A high rate of  
38  
39 284 FQ resistance has also been noted in newly diagnosed MDR/RR TB cases, which might be  
40  
41 285 due to transmission of the drug-resistant strains. <sup>3</sup>It is estimated that in India, by 2032, 85%  
42  
43 286 of multidrug-resistant tuberculosis infections would be from primary transmission, compared  
44  
45 287 with only 15% in 2012. In the *Lancet Public Health*, Law et al have created a dynamic model  
46  
47 288 of the tuberculosis epidemic in India, which they use to estimate the incidence of drug  
48  
49 289 susceptible tuberculosis and multidrug-resistant tuberculosis over the next 20 years<sup>3</sup>. They  
50  
51 290 have analyzed the emergence of drug resistance in all major health-care sectors in India.  
52  
53 291 Private clinics in India are often used by patients seeking TB treatment and they administer  
54  
55  
56  
57  
58  
59  
60



1  
2  
3 292 regimens that are not recommended by standard guidelines. This not only results in  
4  
5 293 suboptimal outcome but also potentially generates MDR TB. They conclude that as multidrug  
6  
7 294 resistant tuberculosis transitions from an acquired condition to a primarily transmitted  
8  
9 295 disease, improving the effectiveness of drug-susceptible tuberculosis treatment can no longer  
10  
11 296 contain the spread of the epidemic. This epidemiological shift has profound resource  
12  
13 297 implications since the cost of treatment of multidrug-resistant tuberculosis treatment can  
14  
15 298 exceed that of first-line tuberculosis therapy by a factor of ten or more.

16  
17 299 In addition, notification data from low-income and middle-income countries, are prone to  
18  
19 300 underreporting and cannot be interpreted without additional information on case detection  
20  
21 301 rate. The DR-TB diagnostic algorithm as given in the PMDT guidelines recommends SL –  
22  
23 302 LPA testing for all RR TB cases diagnosed by the CBNAAT assay. However, it is labor  
24  
25 303 intensive and requires trained manpower. Severe lack of Microbiology laboratories providing  
26  
27 304 universal DST and visual interpretation of bands is a huge limitation especially in smear  
28  
29 305 negative and extra-pulmonary cases with inadequate sample volumes as has been our  
30  
31 306 experience even with version 2 of the test.

32  
33 307 There were several limitations to this study. One of the methodological limitations of our  
34  
35 308 study was that we could not perform liquid culture DST as well as sequencing and confirm  
36  
37 309 the results of the drug resistant isolates. Another limitation was that we did not differentiate  
38  
39 310 between new and previously treated TB cases. Most of the DR-TB patients in our cohort at  
40  
41 311 the time of diagnosis were attached to the PMDT follow up for further evaluation and  
42  
43 312 management except for some who insisted on institutional management. We could therefore  
44  
45 313 put up SL-DST for only 62 cases. We also did not receive any grant for this study and hence  
46  
47 314 could not put up FL-LPA on the 69 culture positive isolates that tested negative by the Xpert  
48  
49 315 MTB/RIF assay. In addition, a study of risk factors in such a high burden setting would have  
50  
51 316 allowed us to offer more useful remedies to policy makers.  
52  
53  
54  
55  
56  
57  
58  
59  
60

1  
2  
3 **317 CONCLUSION**  
4

5 **318** In conclusion, we have not come across any prospective study from India on such a large  
6  
7 **319** number of pulmonary as well as extrapulmonary samples performed by both conventional  
8  
9 **320** and molecular methods. Our study provides comprehensive data on the high burden of drug  
10  
11 **321** resistant TB in India at a 1200 bed tertiary care center in northern India. The need of the hour  
12  
13 **322** is to have enough Mycobacteriology laboratories offering both first and second line DST  
14  
15 **323** under the NTEP umbrella. The high rates of FQ resistance documented in our study should  
16  
17 **324** prompt policy makers to tightly regulate them as reserve drugs, otherwise the ambitious goal  
18  
19 **325** of the Government of India to eliminate tuberculosis by 2025 seems bleak.  
20  
21  
22

23  
24 **326 Acknowledgements** The authors thank Mr. DK Singh, Mr DC Chamoli, Mrs Jyoti Umrao,  
25  
26 **327** Mr Santosh and Mrs Sadhana for providing technical and logistic support.  
27  
28  
29

30  
31 **329 Contributors** RM conceptualized the manuscript, designed the methods, supervised the  
32  
33 **330** study and wrote the manuscript. VK curated the data. AN supervised the study and edited the  
34  
35 **331** manuscript. All authors have reviewed the final version of the manuscript.  
36  
37  
38

39  
40 **333 Funding** The authors have not declared a specific grant for this research from any funding  
41  
42 **334** agency in the public, commercial or not – for- profit sectors.  
43  
44

45 **335**  
46  
47 **336 Competing interests** None declared.  
48

49 **337**

50  
51 **338 Patient consent for publication** Not required.  
52

53 **339**  
54  
55  
56  
57  
58  
59  
60

1  
2  
3 340 **Ethics approval** The study protocol was approved by the Institutional Ethics Committee of  
4  
5 341 Sanjay Gandhi Post Graduate Institute of Medical Sciences. Written informed consent was  
6  
7 342 obtained from each participant.  
8  
9

10 343

11  
12 344 **Data availability statement** Data are available upon reasonable request.  
13  
14

15 345

16  
17 346

18  
19 347

20  
21 348

22  
23 349

24  
25 350

26  
27 351

28  
29 352

30  
31 353

32  
33 354

34  
35 355

36  
37 356

38  
39 357

40  
41 358

42  
43 359

44  
45 360

46  
47 361

48  
49 362

50  
51 363

52  
53 364

54  
55  
56  
57  
58  
59  
60

365 **References**

- 366 1. World Health Organisation. Global tuberculosis report 2020.  
367 [https://www.who.int/tb/publications/global\\_report](https://www.who.int/tb/publications/global_report)
- 368 2. Programmatic Management of Drug Resistance, 2017, Guidelines on  
369 programmatic management of drug resistant tuberculosis in India  
370 2017:Central TB Divison Directorate General of Health Services,  
371 Government of India;2018(cited 2019 Jun 24)
- 372 3. Law S, Piatek A, Vincent C, et al.Emergence of drug resistance in  
373 patients with tuberculosis cared for by the Indian health-care system: a  
374 dynamic modelling study *Lancet Public Health* 2017;2: e47–55.
- 375 4. ChatterjeeS,PoonawalaH,JainY.Drugresistanttuberculosis:isIndiareadyfor  
376 thechallenge?*BMJGlobHealth*2018;3:e000971
- 377 5. Mirzayev F, Viney K, NhatLinh N,et al. World Health Organization  
378 recommendations onthe treatment of drug-resistant tuberculosis, 2020  
379 update. *EurRespir J*2020; in press  
380 (<https://doi.org/10.1183/13993003.03300-2020>).
- 381 6. Deun V, Maug AK, Salim MA, et al. Short, highly effective, and  
382 inexpensive standardized treatment of multidrug-resistant tuberculosis.  
383 *Am J Respir Crit Care Med.* 2010 ;182:684-92. doi:  
384 [10.1164/rccm.201001-0077OC](https://doi.org/10.1164/rccm.201001-0077OC)
- 385 7. India TB Report 2020: National TB Elimination Report Annual report.  
386 Central TB Divison,. Ministry of Health and Family welfare.  
387 [www.tbcindia.gov.in](http://www.tbcindia.gov.in)
- 388 8. Definitions and reporting framework for tuberculosis 2013  
389 revision(updated Dec 2014&Jan 2020), WHO([www.who.int](http://www.who.int))

- 1  
2  
3 390 9. Ministry of Health and Family Welfare GoI. *Report of the first*  
4  
5 391 *national anti-tuberculosis drug resistance survey, 2014-16*, 2018  
6  
7 392 10. Amitapitre. A Rapid Gender Assessment of Tuberculosis in India. 2018.  
8  
9 393 11. Udhwadia Z, Mullerpattan J, Shah K , et al. Possible impact of the  
10  
11 394 standardized Category IV regimen on multidrug-resistant tuberculosis  
12  
13 395 patients in Mumbai. *Lung india*. 2016; 33: 253–56.  
14  
15 396 12. Shivekar, S.S., Kaliaperumal, V., Brammacharry, U. *et al*. Prevalence and  
16  
17 397 factors associated with multidrug-resistant tuberculosis in South  
18  
19 398 India. *SciRep* 2020;10: 17552. [https://doi.org/10.1038/s41598-020-](https://doi.org/10.1038/s41598-020-74432-y)  
20  
21 399 [74432-y](https://doi.org/10.1038/s41598-020-74432-y)  
22  
23 400 13. Goyal V, Kadam V, Narang P , et al .Prevalence of drug-resistant  
24  
25 401 pulmonary tuberculosis in India: systematic review and meta-  
26  
27 402 analysis. *BMC Public Health*. 2017; 17:817  
28  
29 403 14. Marlowe E, Novak-Weekley S, Cumpio J, Sharp S, Momeny M, Babst A  
30  
31 404 et al Evaluation of the Cepheid Xpert MTB/RIF assay for direct detection  
32  
33 405 of Mycobacterium tuberculosis complex in respiratory specimens. *J. Clin.*  
34  
35 406 *Microbiol*. 2011; 49:1621–1623  
36  
37 407 15. Zeka A, Tasbakan S, Cavusoglu C. Evaluation of the GeneXpert  
38  
39 408 MTB/RIF Assay for Rapid Diagnosis of Tuberculosis and Detection of  
40  
41 409 Rifampin Resistance in Pulmonary and Extrapulmonary Specimens. *J*  
42  
43 410 *Clin Microbiol*. 2011; 49:4138–41  
44  
45 411 16. Sethi S, Agarwal P, Khaneja R ,et al. Second-line Drug Resistance  
46  
47 412 Characterization in *Mycobacterium tuberculosis* by Genotype MTBDRsl  
48  
49 413 Assay. *Journal of Epidemiology and Global Health*. 2020;10: 42-45  
50  
51  
52  
53  
54  
55  
56  
57  
58  
59  
60

- 1  
2  
3 414 17. Dalal A, Pawaskar A, Das M, et al.) Resistance Patterns among  
4  
5 415 Multidrug-Resistant Tuberculosis Patients in Greater Metropolitan  
6  
7 416 Mumbai: Trends over Time. *PLoS ONE*.2015;10: e0116798.  
8  
9  
10 417 <https://doi.org/10.1371/journal.pone.0116798>  
11  
12 418 18. Ho J, Jelfs P, Sintchenko V. Fluoroquinolone resistance in non-multidrug-  
13  
14 419 resistant tuberculosis— a surveillance study in New South Wales,  
15  
16 420 Australia, and a review of global resistance rates. *Int J Infect Dis*2014;26:  
17  
18 421 149–153  
19  
20 422 19. Chee CBE, KhinMar K-W, Sng L-H, et al.The shorter multidrug-resistant  
21  
22 423 tuberculosis treatment regimen in Singapore: are patients from South-East  
23  
24 424 Asia eligible? *Eur Respir J* 2017; 50:170075  
25  
26 425 20. Singh PK, Jain A. Limited scope of shorter drug regimen for MDR TB  
27  
28 426 caused by high resistance to fluoroquinolone.  
29  
30 427 *EmergInfectDis*.2019;25:1760-62.  
31  
32 428 21. McDowell A, Pai M. Treatment as diagnosis and diagnosis as treatment:  
33  
34 429 empirical management of presumptive tuberculosis in India . *Int J*  
35  
36 430 *tubercLung Dis*. 2016;20:536–543  
37  
38  
39  
40  
41  
42  
43  
44  
45  
46  
47  
48  
49  
50  
51  
52  
53  
54  
55  
56  
57  
58  
59  
60

1  
2  
3 **439 Table 1.** Smear and culture results among samples positive by Xpert MTB /RIF assay

4  
5 440 (n=1032)

6  
7 441

| Sample (N=1032)<br>(%)     | Smear positive | Culture positive (%) |
|----------------------------|----------------|----------------------|
| Pulmonary(n=706)           | 382(54.1%)     | 384(54.3%)           |
| Extra-<br>pulmonary(n=326) | 125(38.3%)     | 133(40.7%)           |
| Total                      | 507(49.1%)     | 517(50%)             |

8  
9  
10  
11  
12  
13  
14  
15  
16  
17  
18  
19  
20  
21  
22  
23  
24 442

25  
26 443

27  
28 444

29  
30 445

31  
32 446

33  
34 447

35  
36 448

37  
38 449

39  
40 450

41  
42 451

43  
44 452

45  
46 453

47  
48 454

49  
50 455

51  
52 456

53  
54 457

1  
2  
3 **458 Table 2:** Comparison of Gene Xpert MTB / RIF positive, MTB culture positive results with  
4  
5 smear results  
6 **459**

7  
8 **460**

9  
10 **461**

|          | SmearMTB culture +<br>Gene Xpert+ | MTB culture +<br>Gene Xpert- | MTB culture–<br>Gene Xpert+ | MTB culture–<br>Gene Xpert– | Total |
|----------|-----------------------------------|------------------------------|-----------------------------|-----------------------------|-------|
| Positive | 336                               | 0                            | 171                         | 0                           | 507   |
| Negative | 112                               | 69                           | 413                         | 1944                        | 2538  |
| Total    | 448                               | 69                           | 584                         | 1944                        | 3045  |

11  
12  
13  
14  
15  
16  
17  
18  
19  
20  
21  
22  
23  
24  
25  
26  
27 **462**

28  
29 **463**

30  
31 **464**

32  
33 **465**

34  
35 **466**

36  
37 **467**

38  
39 **468**

40  
41 **469**

42  
43 **470**

44  
45 **471**

46  
47 **472**

48  
49 **473**

50  
51 **474**

52  
53 **475**

54  
55 **476**



1  
2  
3 477 **Figure legends**  
4

5 478

6  
7  
8 479 **Figure 1.** Age distribution of cases positive by Xpert MTB/ RIF assay (n=1032)  
9

10 480

11  
12 481 **Figure 2.** Distribution of samples positive by the Xpert MTB/RIF assay (n=1032)  
13

14 482

15  
16  
17 483 **Figure 3.** Results of conventional and molecular diagnostic testing by Xpert MTB/ RIF assay  
18  
19 484 of samples included in the study (n=3045)  
20

21 485

22  
23 486 **Figure 4.** Distribution of samples among rifampicin resistant cases (n=223)  
24

25 487

26  
27  
28 488 **Figure 5:** Results for second line susceptibility testing performed by line probe assay (LPA)  
29

30 489 version2  
31

32 490  
33  
34  
35  
36  
37  
38  
39  
40  
41  
42  
43  
44  
45  
46  
47  
48  
49  
50  
51  
52  
53  
54  
55  
56  
57  
58  
59  
60

1  
2  
3  
4  
5  
6  
7  
8  
9  
10  
11  
12  
13  
14  
15  
16  
17  
18  
19  
20  
21  
22  
23  
24  
25  
26  
27  
28  
29  
30  
31  
32  
33  
34  
35  
36  
37  
38  
39  
40  
41  
42  
43  
44  
45  
46  
47  
48  
49  
50  
51  
52  
53  
54  
55  
56  
57  
58  
59  
60

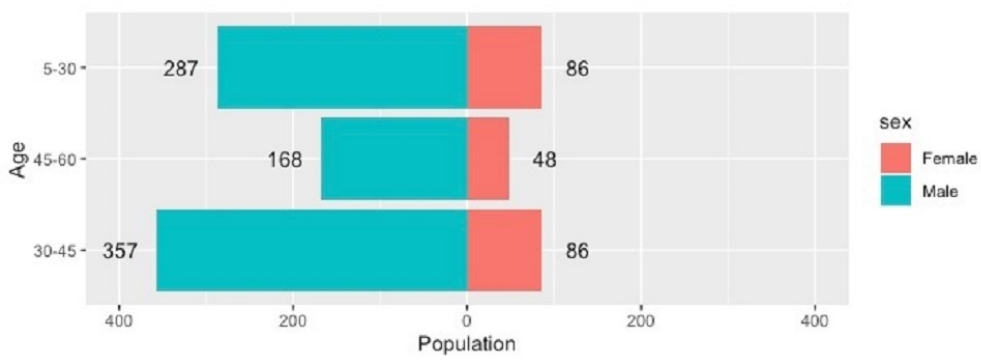

81x29mm (300 x 300 DPI)

1  
2  
3  
4  
5  
6  
7  
8  
9  
10  
11  
12  
13  
14  
15  
16  
17  
18  
19  
20  
21  
22  
23  
24  
25  
26  
27  
28  
29  
30  
31  
32  
33  
34  
35  
36  
37  
38  
39  
40  
41  
42  
43  
44  
45  
46  
47  
48  
49  
50  
51  
52  
53  
54  
55  
56  
57  
58  
59  
60

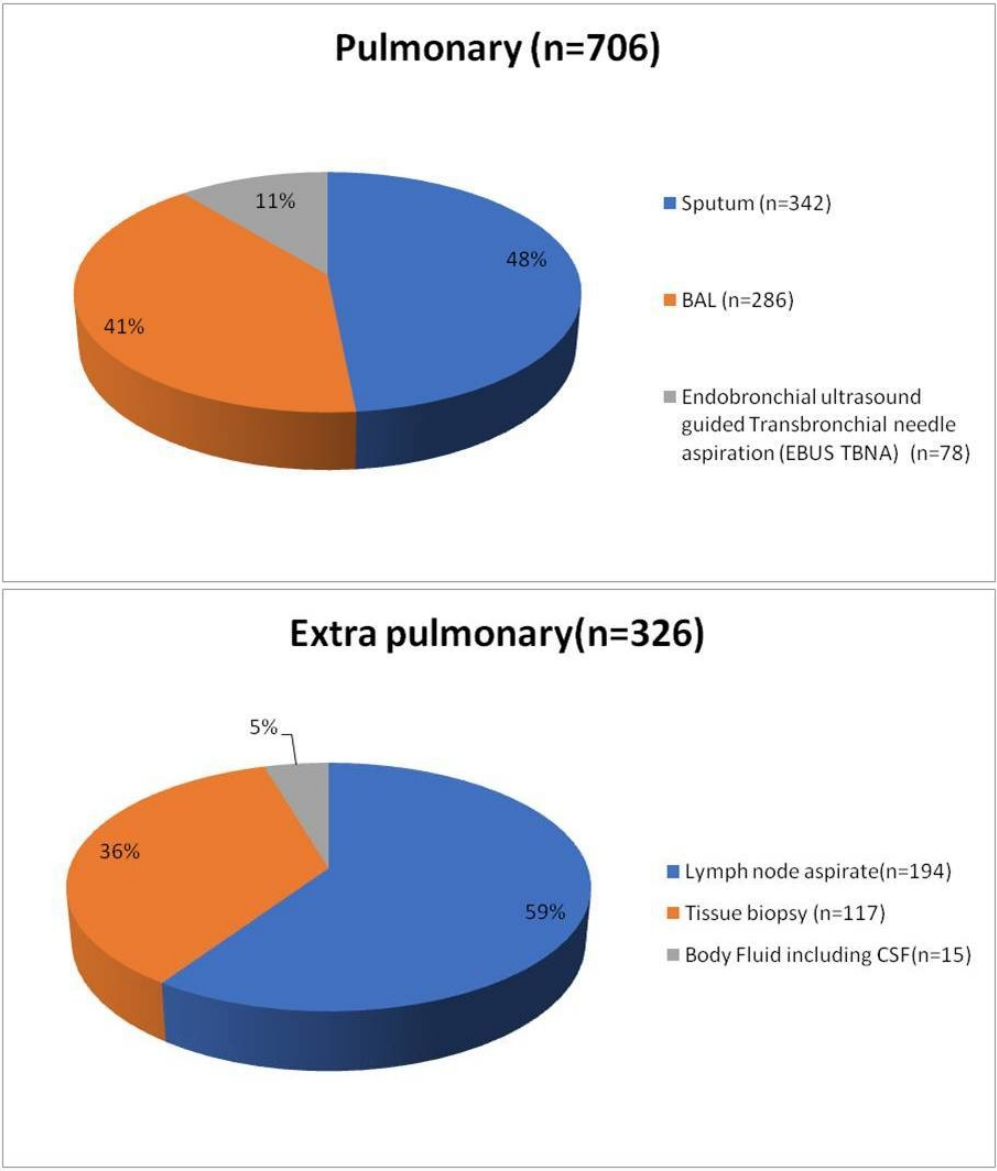

76x90mm (300 x 300 DPI)

1  
2  
3  
4  
5  
6  
7  
8  
9  
10  
11  
12  
13  
14  
15  
16  
17  
18  
19  
20  
21  
22  
23  
24  
25  
26  
27  
28  
29  
30  
31  
32  
33  
34  
35  
36  
37  
38  
39  
40  
41  
42  
43  
44  
45  
46  
47  
48  
49  
50  
51  
52  
53  
54  
55  
56  
57  
58  
59  
60

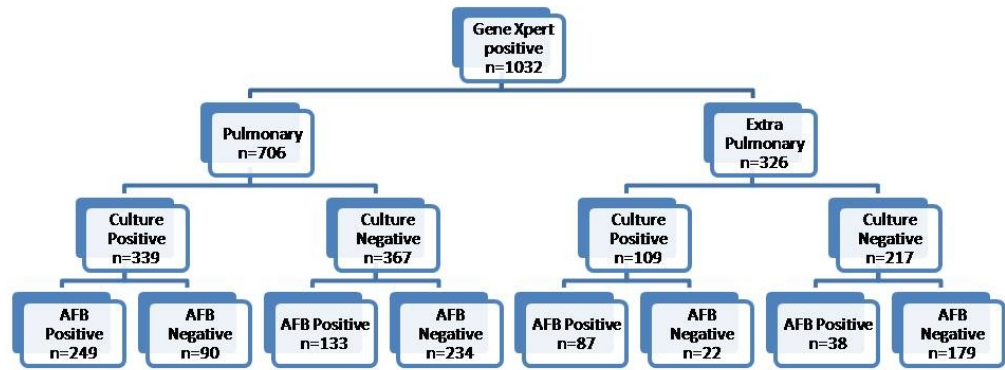

80x66mm (300 x 300 DPI)

1  
2  
3  
4  
5  
6  
7  
8  
9  
10  
11  
12  
13  
14  
15  
16  
17  
18  
19  
20  
21  
22  
23  
24  
25  
26  
27  
28  
29  
30  
31  
32  
33  
34  
35  
36  
37  
38  
39  
40  
41  
42  
43  
44  
45  
46  
47  
48  
49  
50  
51  
52  
53  
54  
55  
56  
57  
58  
59  
60

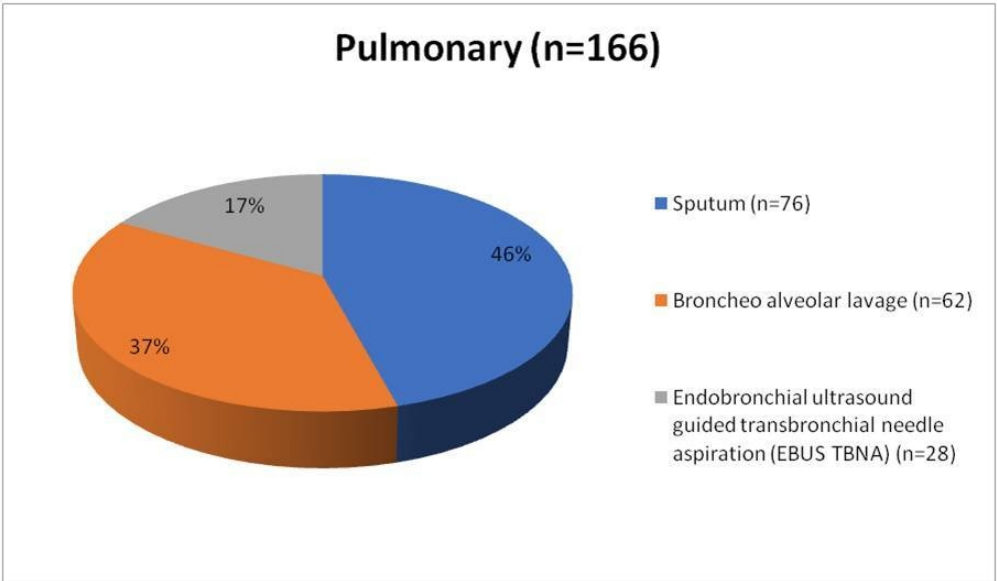

### Extra pulmonary (n=57)

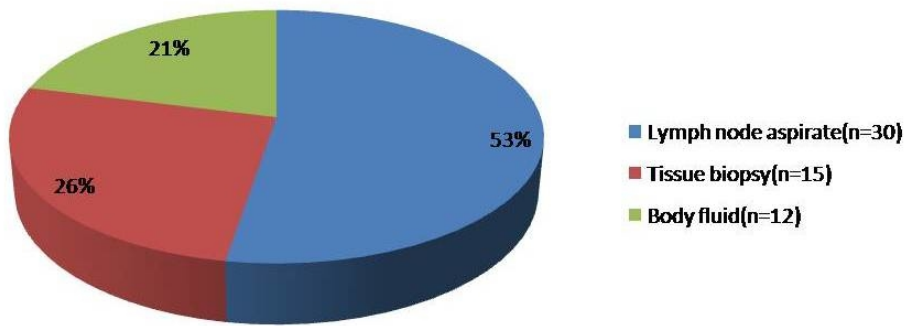

76x89mm (300 x 300 DPI)

1  
2  
3  
4  
5  
6  
7  
8  
9  
10  
11  
12  
13  
14  
15  
16  
17  
18  
19  
20  
21  
22  
23  
24  
25  
26  
27  
28  
29  
30  
31  
32  
33  
34  
35  
36  
37  
38  
39  
40  
41  
42  
43  
44  
45  
46  
47  
48  
49  
50  
51  
52  
53  
54  
55  
56  
57  
58  
59  
60

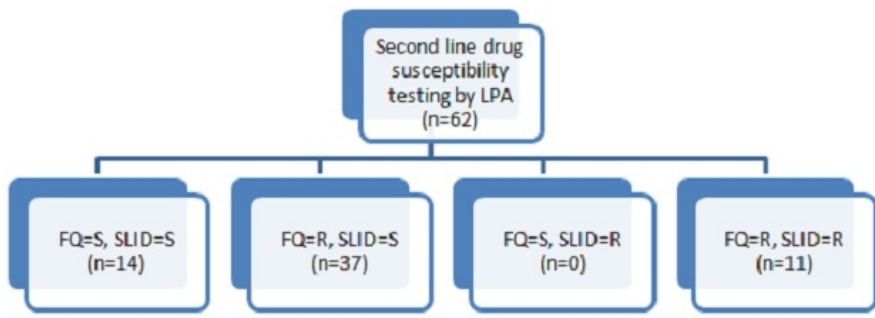

**S = Sensitive; R = Resistant; FQ = Floroquinolones; SLID = Second line injectable drugs**

59x29mm (300 x 300 DPI)

**STROBE 2007 (v4) Statement—Checklist of items that should be included in reports of *cohort studies***

| Section/Topic                | Item # | Recommendation                                                                                                                                                                       | Reported on page #/Line no. |
|------------------------------|--------|--------------------------------------------------------------------------------------------------------------------------------------------------------------------------------------|-----------------------------|
| <b>Title and abstract</b>    | 1      | (a) Indicate the study's design with a commonly used term in the title or the abstract                                                                                               | #1/2-3                      |
|                              |        | (b) Provide in the abstract an informative and balanced summary of what was done and what was found                                                                                  | #2/23-38                    |
| <b>Introduction</b>          |        |                                                                                                                                                                                      |                             |
| Background/rationale         | 2      | Explain the scientific background and rationale for the investigation being reported                                                                                                 | #4/72-87                    |
| Objectives                   | 3      | State specific objectives, including any prespecified hypotheses                                                                                                                     | #4/88-90                    |
| <b>Methods</b>               |        |                                                                                                                                                                                      |                             |
| Study design                 | 4      | Present key elements of study design early in the paper                                                                                                                              | #4/93-96                    |
| Setting                      | 5      | Describe the setting, locations, and relevant dates, including periods of recruitment, exposure, follow-up, and data collection                                                      | #4/93-97<br>#6/124-125      |
| Participants                 | 6      | (a) Give the eligibility criteria, and the sources and methods of selection of participants. Describe methods of follow-up                                                           | #6/128-142                  |
|                              |        | (b) For matched studies, give matching criteria and number of exposed and unexposed                                                                                                  | NA                          |
| Variables                    | 7      | Clearly define all outcomes, exposures, predictors, potential confounders, and effect modifiers. Give diagnostic criteria, if applicable                                             | #7/166-181                  |
| Data sources/<br>measurement | 8*     | For each variable of interest, give sources of data and details of methods of assessment (measurement). Describe comparability of assessment methods if there is more than one group | NA                          |
| Bias                         | 9      | Describe any efforts to address potential sources of bias                                                                                                                            | #9/203-205                  |
| Study size                   | 10     | Explain how the study size was arrived at                                                                                                                                            | #5/100-104                  |
| Quantitative variables       | 11     | Explain how quantitative variables were handled in the analyses. If applicable, describe which groupings were chosen and why                                                         | NA                          |
| Statistical methods          | 12     | (a) Describe all statistical methods, including those used to control for confounding                                                                                                | #8/168-175                  |
|                              |        | (b) Describe any methods used to examine subgroups and interactions                                                                                                                  | #7/152-153                  |
|                              |        | (c) Explain how missing data were addressed                                                                                                                                          | #6/120-122                  |
|                              |        | (d) If applicable, explain how loss to follow-up was addressed                                                                                                                       | NA                          |
|                              |        | (e) Describe any sensitivity analyses                                                                                                                                                | #8/168-175                  |
| <b>Results</b>               |        |                                                                                                                                                                                      |                             |

|                          |     |                                                                                                                                                                                                                                                                                                                                                                                                               |                                                |
|--------------------------|-----|---------------------------------------------------------------------------------------------------------------------------------------------------------------------------------------------------------------------------------------------------------------------------------------------------------------------------------------------------------------------------------------------------------------|------------------------------------------------|
| Participants             | 13* | (a) Report numbers of individuals at each stage of study—eg numbers potentially eligible, examined for eligibility, confirmed eligible, included in the study, completing follow-up, and analysed<br>(b) Give reasons for non-participation at each stage<br>(c) Consider use of a flow diagram                                                                                                               | #6/126-142<br>NA<br>#7/159-161<br>#8/177-178   |
| Descriptive data         | 14* | (a) Give characteristics of study participants (eg demographic, clinical, social) and information on exposures and potential confounders<br>(b) Indicate number of participants with missing data for each variable of interest<br>(c) Summarise follow-up time (eg, average and total amount)                                                                                                                | #7/152-154<br>#6/1120-122<br>#13/307-310<br>NA |
| Outcome data             | 15* | Report numbers of outcome events or summary measures over time                                                                                                                                                                                                                                                                                                                                                | NA                                             |
| Main results             | 16  | (a) Give unadjusted estimates and, if applicable, confounder-adjusted estimates and their precision (eg, 95% confidence interval). Make clear which confounders were adjusted for and why they were included<br>(b) Report category boundaries when continuous variables were categorized<br>(c) If relevant, consider translating estimates of relative risk into absolute risk for a meaningful time period | NA<br>#7/152-154<br>NA                         |
| Other analyses           | 17  | Report other analyses done—eg analyses of subgroups and interactions, and sensitivity analyses                                                                                                                                                                                                                                                                                                                | #7/168-172                                     |
| <b>Discussion</b>        |     |                                                                                                                                                                                                                                                                                                                                                                                                               |                                                |
| Key results              | 18  | Summarise key results with reference to study objectives                                                                                                                                                                                                                                                                                                                                                      | #13/314-321                                    |
| <b>Limitations</b>       |     |                                                                                                                                                                                                                                                                                                                                                                                                               |                                                |
| Interpretation           | 20  | Give a cautious overall interpretation of results considering objectives, limitations, multiplicity of analyses, results from similar studies, and other relevant evidence                                                                                                                                                                                                                                    | #11/251-258<br>#13/304-312                     |
| Generalisability         | 21  | Discuss the generalisability (external validity) of the study results                                                                                                                                                                                                                                                                                                                                         | #13/317-321                                    |
| <b>Other information</b> |     |                                                                                                                                                                                                                                                                                                                                                                                                               |                                                |
| Funding                  | 22  | Give the source of funding and the role of the funders for the present study and, if applicable, for the original study on which the present article is based                                                                                                                                                                                                                                                 | #13/307-312                                    |

\*Give information separately for cases and controls in case-control studies and, if applicable, for exposed and unexposed groups in cohort and cross-sectional studies.

**Note:** An Explanation and Elaboration article discusses each checklist item and gives methodological background and published examples of transparent reporting. The STROBE checklist is best used in conjunction with this article (freely available on the Web sites of PLoS Medicine at <http://www.plosmedicine.org/>, Annals of Internal Medicine at <http://www.annals.org/>, and Epidemiology at <http://www.epidem.com/>). Information on the STROBE Initiative is available at [www.strobe-statement.org](http://www.strobe-statement.org).
